# Supplementary material for: Influence of bulky substituents on the photophysical properties of homoleptic iridium(iii) complexes
Source: Royal Society of Chemistry journal article supplement (doi:10.1039/c8cp07759b), 2019-01-01
Supplement: c8cp07759b1.pdf [file c8cp07759b1.pdf]

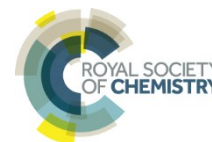

PCCP

## Electronic Supplementary Information

### Influences of bulky substituent on the photophysical properties of homoleptic Iridium(III) complexes

Jin-Hyoung Kim,<sup>a</sup> So-Yoen Kim,<sup>a</sup> Dae Won Cho,<sup>\*ab</sup> Ho-Jin Son<sup>\*a</sup> and Sang Ook Kang<sup>\*a</sup>

<sup>a</sup> Department of Advanced Materials Chemistry, Korea University, Sejong, 30019, South Korea

<sup>b</sup> Center for Photovoltaic Materials, Korea University, Sejong, 30019, South Korea.

## Contents

### General Procedure and references

### Supporting Figures

**Fig. S1** The ligand and Ir complexes emission spectra of ppy, Me-ppy, Ph-ppy, MePh-ppy, and diMePh-ppy.

**Fig. S2** Phosphorescence emission decay profiles for Ir(ppy)<sub>3</sub>, Ir(Me-ppy)<sub>3</sub>, Ir(Ph-ppy)<sub>3</sub>, Ir(MePh-ppy)<sub>3</sub>, and Ir(diMePh-ppy)<sub>3</sub>.

### <sup>1</sup>H-NMR Spectra

**Fig. S3** For diMePh-ppy.

**Fig. S4** For Ir(Me-ppy)<sub>3</sub>.

**Fig. S5** For Ir(Ph-ppy)<sub>3</sub>.

**Fig. S6** For Ir(MePh-ppy)<sub>3</sub>.

**Fig. S7** For Ir(diMePh-ppy)<sub>3</sub>.

### ESI Mass Spectra

**Fig. S8** For diMePh-ppy.

**Fig. S9** For Ir(Me-ppy)<sub>3</sub>.

**Fig. S10** For Ir(Ph-ppy)<sub>3</sub>.

**Fig. S11** For Ir(MePh-ppy)<sub>3</sub>.

**Fig. S12** For Ir(diMePh-ppy)<sub>3</sub>.

### Supporting Table

**Table S1** Electrochemical and computed molecular orbital energy data of Ir(ppy)<sub>3</sub>, Ir(Me-ppy)<sub>3</sub>, Ir(Ph-ppy)<sub>3</sub>, Ir(MePh-ppy)<sub>3</sub>, and Ir(diMePh-ppy)<sub>3</sub>

**Table S2** For transitions related to S<sub>0</sub>→T<sub>1</sub> and S<sub>0</sub>→S<sub>1</sub>. The energies ( $\lambda_{cal}$  and  $E_{cal}$ ), oscillator strengths ( $f$ ), orbital contributions (>20%), and assignments of for Ir(ppy)<sub>3</sub>, Ir(Me-ppy)<sub>3</sub>, Ir(Ph-ppy)<sub>3</sub>, Ir(MePh-ppy)<sub>3</sub>, and Ir(diMePh-ppy)<sub>3</sub> evaluated by TD-DFT calculations

**Table S3** Cartesian Coordinates of ppy, Me-ppy, Ph-ppy, MePh-ppy, and diMePh-ppy

**Table S4** Cartesian Coordinates of Ir(ppy)<sub>3</sub>, Ir(Me-ppy)<sub>3</sub>, Ir(Ph-ppy)<sub>3</sub>, Ir(MePh-ppy)<sub>3</sub>, and Ir(diMePh-ppy)<sub>3</sub>

**Table S5** Selected bond-lengths, dihedral angles, and their differences

**General Procedures:** All compounds were synthesized in a dry N<sub>2</sub> atmosphere. All solvent used were distilled over sodium–benzophenone or calcium chloride under nitrogen prior to use. All solvents were stored over molecular sieves. Glassware, syringes, magnetic stirring bars, and needles were dried in a convection oven for over 4 h. Reactions were checked using thin-layer chromatography (TLC; Merck Co.). The spots developed to TLC were identified under UV light at 254 or 365 nm. Column chromatography was performed on 60 G silica gel (particle size 5–40 μm; Merck Co.). The <sup>1</sup>H-NMR spectra were recorded on a Varian Mercury 300 spectrometer (operating at 300.1 MHz). All proton chemical shifts were measured relative to internal residual benzene from the lock solvent (99.5% CDCl<sub>3</sub>). High Resolution Tandem Mass Spectrometry (Jeol LTD JMS-HX 110/110A) was performed at the Korean Basic Science Institute (Seoul). 2-(2-bromophenyl)pyridine,<sup>1</sup> Ph-ppy,<sup>2</sup> MePh-ppy,<sup>2</sup> Me-ppy,<sup>3</sup> and Ir(ppy)<sub>3</sub><sup>4</sup> were synthesized using previously reported methods.

### Reference

- 1 Y. L. Rao, H. Amarne, S. B. Zhao, T. M. McCormick, S. Martic, Y. Sun, R. Y. Wang and S. Wang, *J. Am. Chem. Soc.*, 2008, **130**, 12898–12900.
- 2 W. Y. Yu, W. N. Sit, Z. Zhou and A. S. Chan, *Org. Lett.*, 2009, **11**, 3174–3177.
- 3 A. J. Paterson, C. J. Heron, C. L. McMullin, M. F. Mahon, N. J. Press and C. G. Frost, *Org. Biomol. Chem.*, 2017, **15**, 5993–6000.  
A. B. Tamayo, B. D. Alleyne, P. I. Djurovich, S. Lamansky, I. Tsyba, N. N. Ho, R. Bau and M. E. Thompson, *J. Am. Chem. Soc.*, 2003, **125**, 7377–7387.

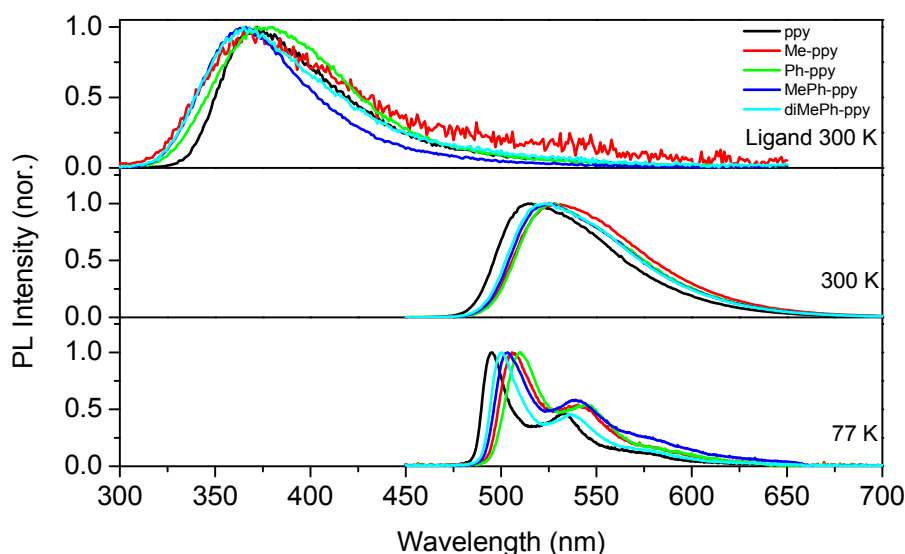

**Fig. S1** (top) The emission spectra of **ppy**, **Me-ppy**, **Ph-ppy**, **MePh-ppy**, and **diMePh-ppy** in CH<sub>2</sub>Cl<sub>2</sub> measured at 300 K ( $\lambda_{\text{ex}} = 275$  nm), (middle) the emission spectra **Ir(ppy)<sub>3</sub>**, **Ir(Me-ppy)<sub>3</sub>**, **Ir(Ph-ppy)<sub>3</sub>**, **Ir(MePh-ppy)<sub>3</sub>**, and **Ir(diMePh-ppy)<sub>3</sub>** in CH<sub>2</sub>Cl<sub>2</sub> measured at 300 K ( $\lambda_{\text{ex}} = 300$  nm) and (bottom) the emission spectra in MTHF at 77 K ( $\lambda_{\text{ex}} = 355$  nm).

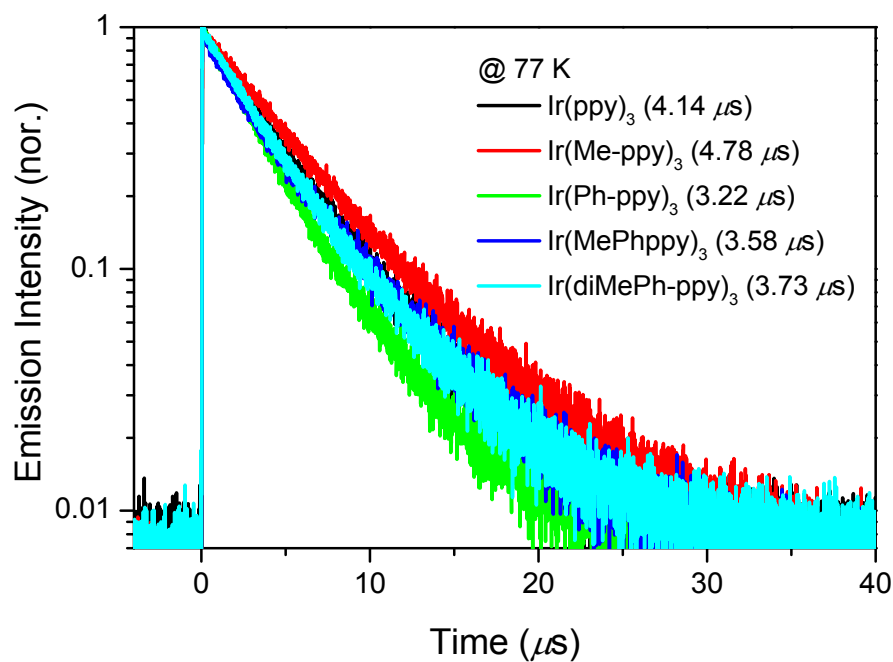

**Fig. S2** Phosphorescence emission decay profiles for Ir(ppy)<sub>3</sub>, Ir(Me-ppy)<sub>3</sub>, Ir(Ph-ppy)<sub>3</sub>, Ir(MePh-ppy)<sub>3</sub>, and Ir(diMePh-ppy)<sub>3</sub> in MTHF measured at 77 K ( $\lambda_{\text{ex}} = 355$  nm).

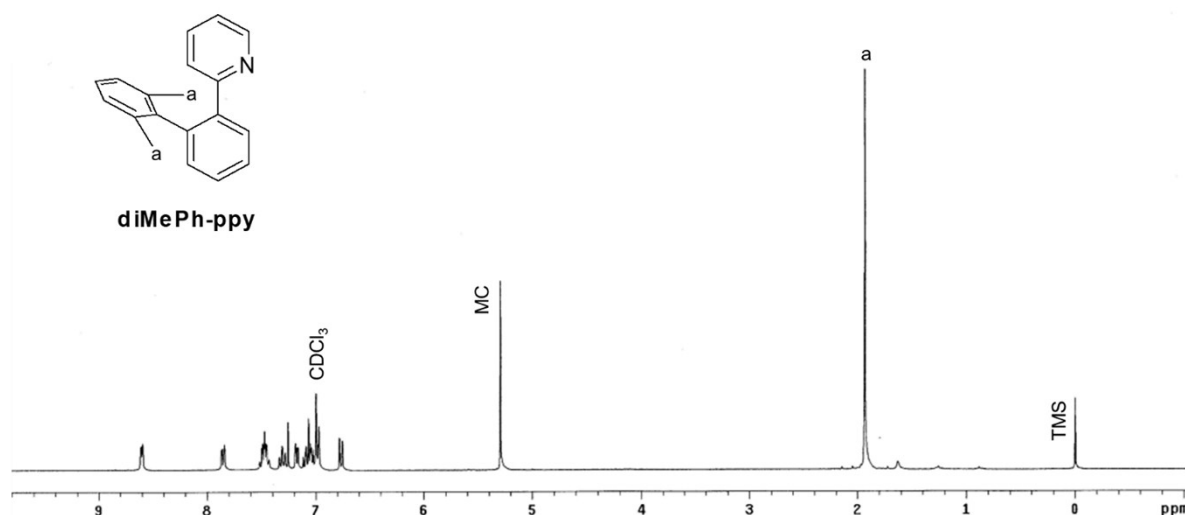

**Fig. S3** <sup>1</sup>H-NMR spectrum of diMePh-ppy in CDCl<sub>3</sub>

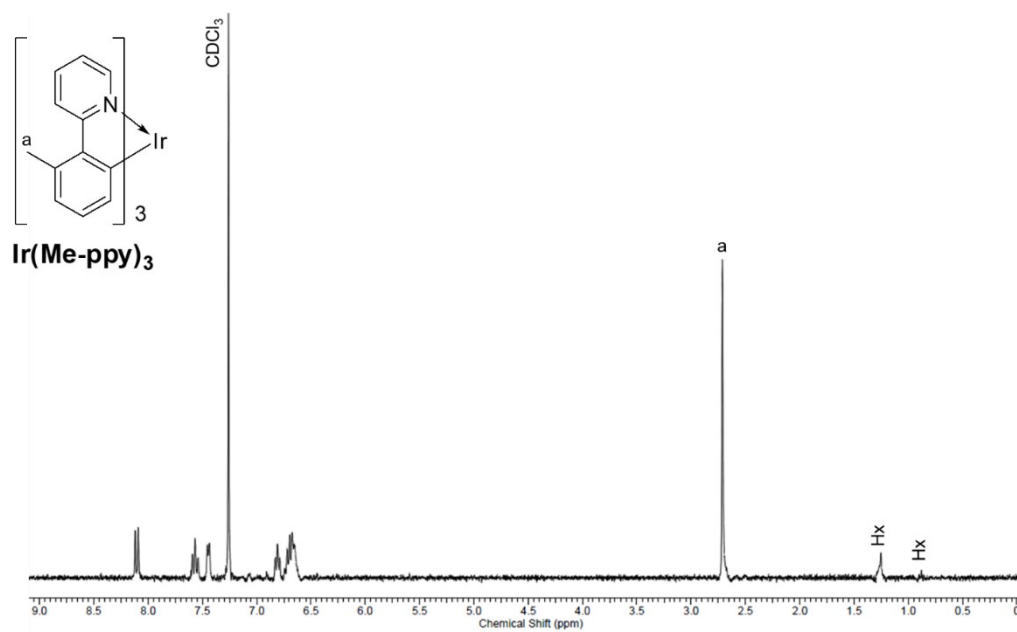

Fig. S4  $^1\text{H-NMR}$  spectrum of  $\text{Ir}(\text{Me-ppy})_3$  in  $\text{CDCl}_3$ .

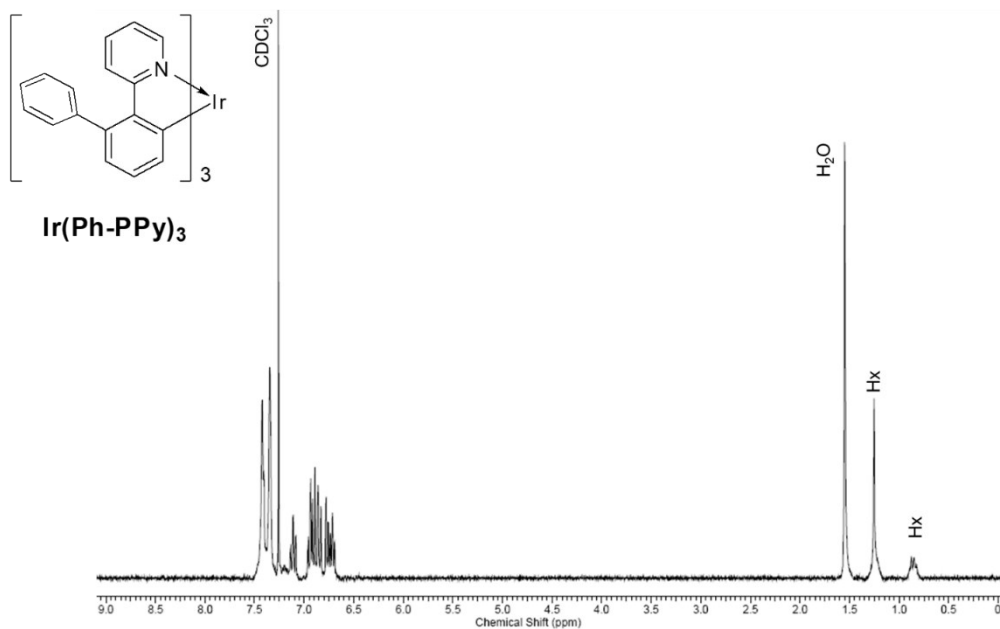

Fig. S5  $^1\text{H-NMR}$  spectrum of  $\text{Ir}(\text{Ph-ppy})_3$  in  $\text{CDCl}_3$ .

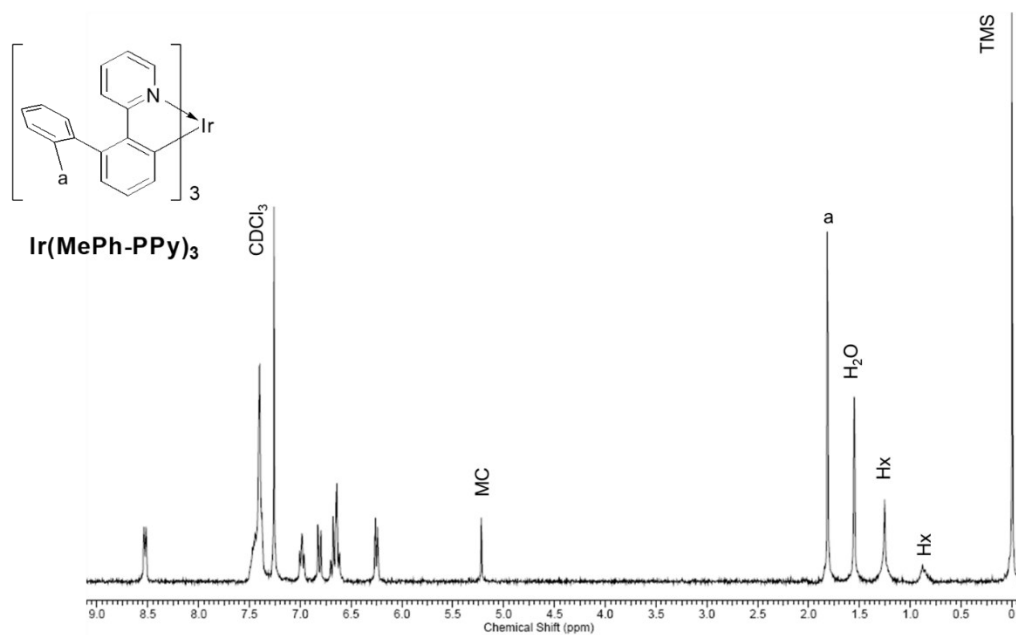

Fig. S6  $^1\text{H-NMR}$  spectrum of  $\text{Ir}(\text{MePh-ppy})_3$  in  $\text{CDCl}_3$ .

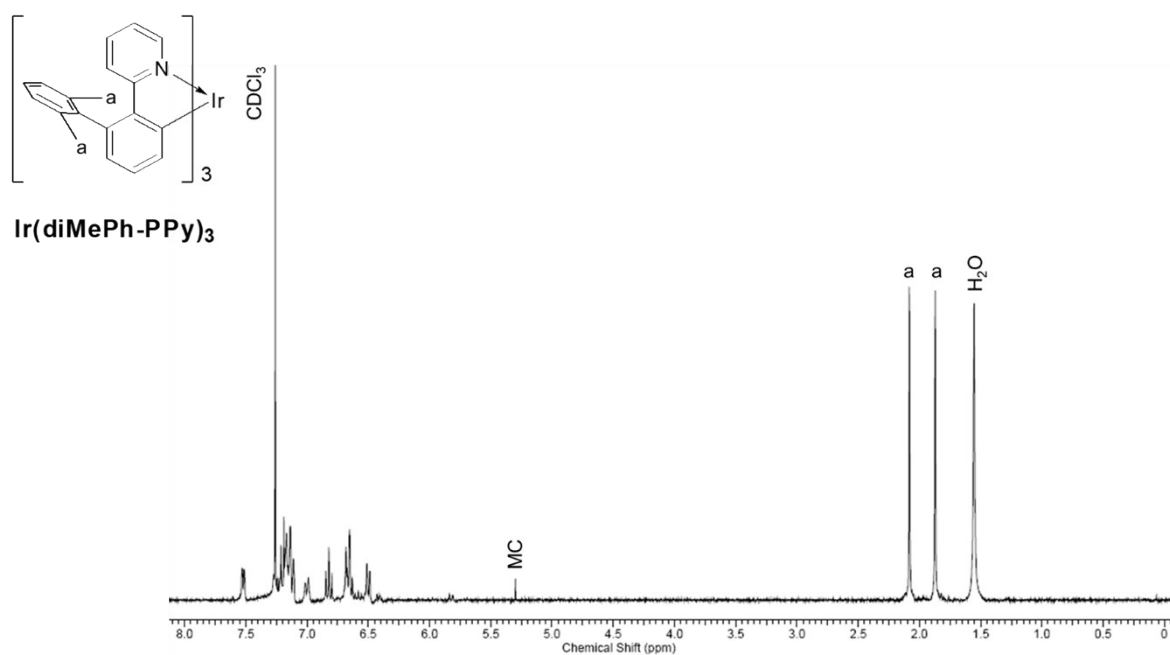

Fig. S7  $^1\text{H-NMR}$  spectrum of  $\text{Ir}(\text{diMePh-ppy})_3$  in  $\text{CDCl}_3$ .

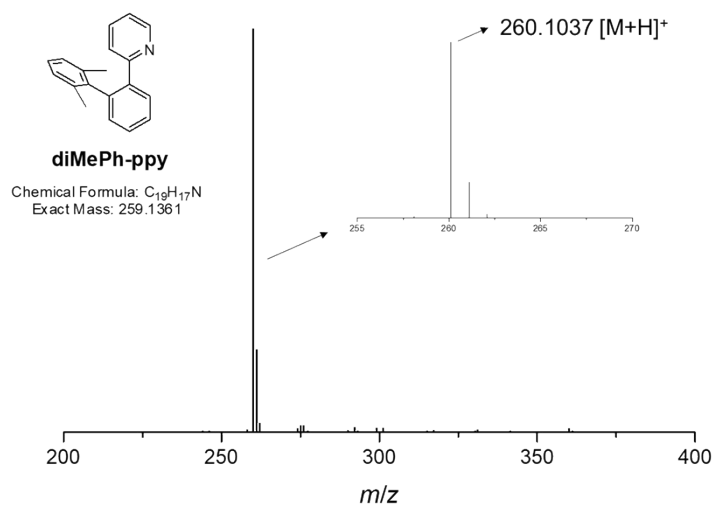

**Fig. S8** ESI-Mass spectrum of **diMePh-ppy**.

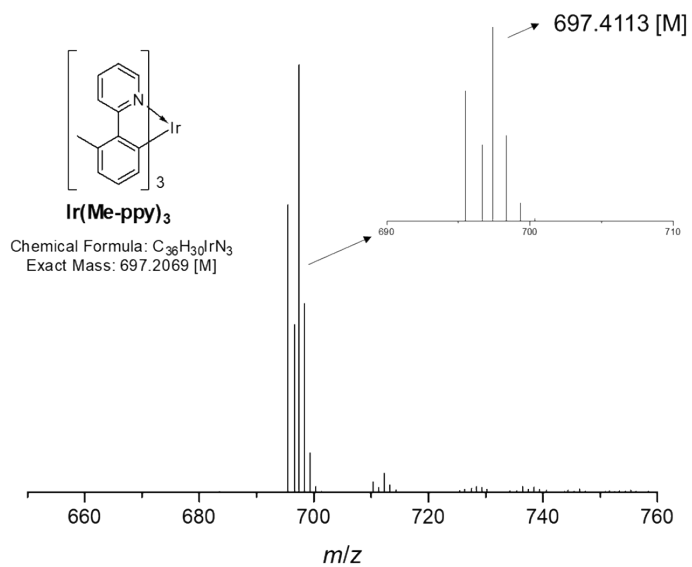

**Fig. S9** ESI-Mass spectrum of **Ir(Me-ppy)<sub>3</sub>**.

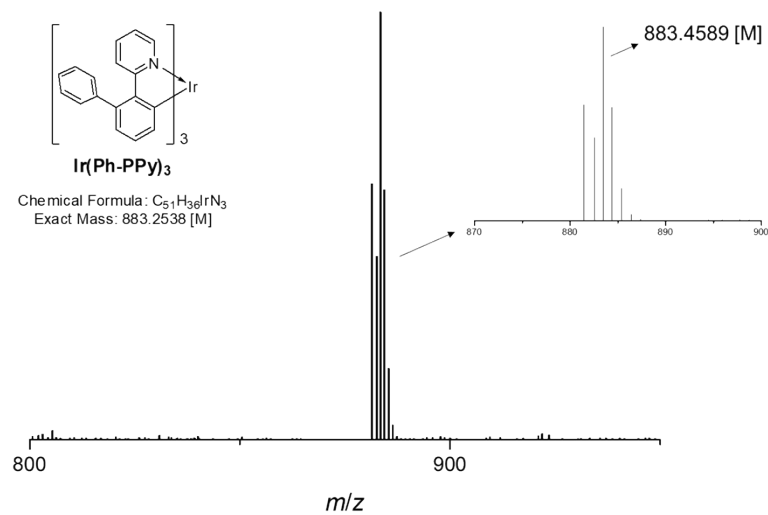

**Fig. S10** ESI-Mass spectrum of  $\text{Ir}(\text{Ph-ppy})_3$ .

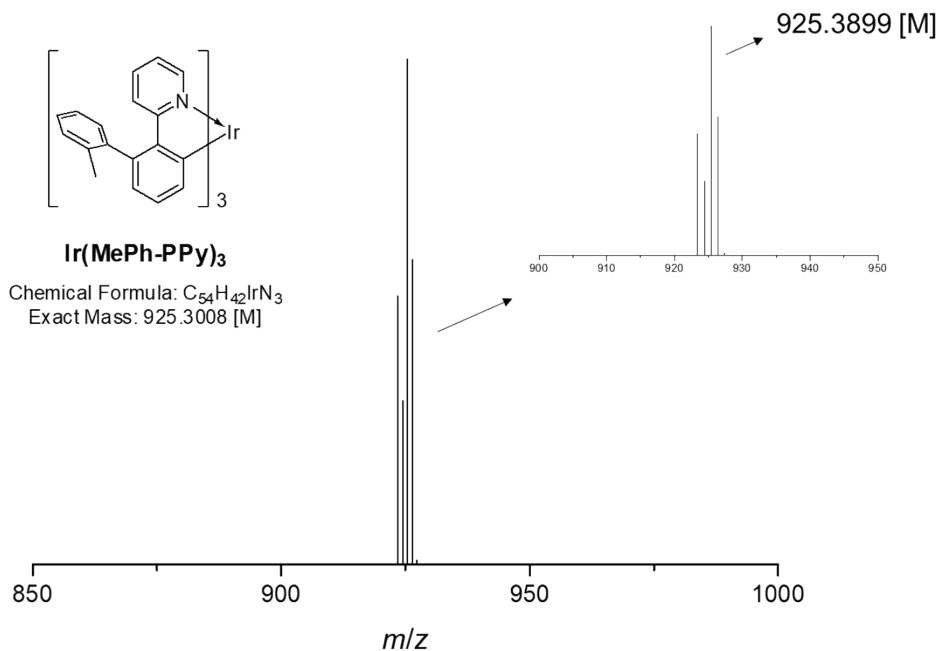

**Fig. S11** ESI-Mass spectrum of  $\text{Ir}(\text{MePh-ppy})_3$ .

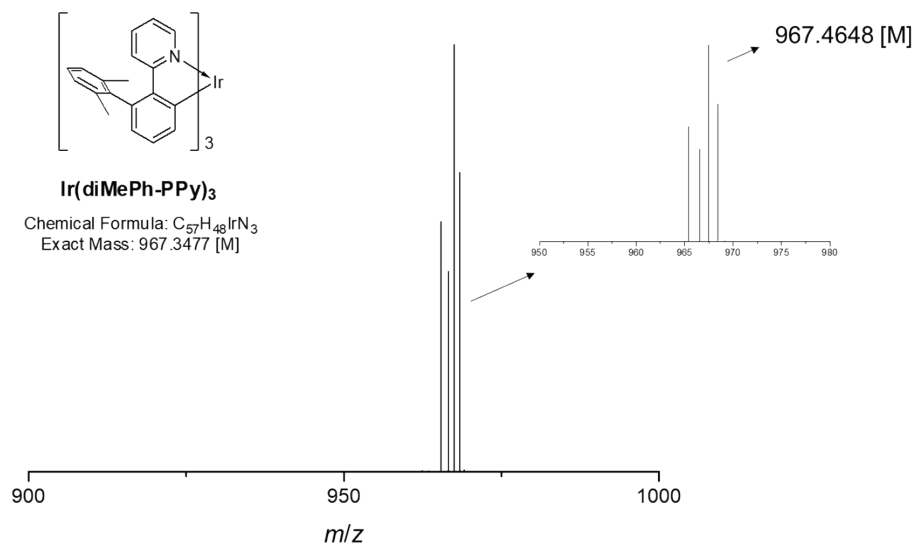

**Fig. S12** ESI-Mass spectrum of Ir(diMePh-ppy)<sub>3</sub>.

**Table S1.** Electrochemical and computed molecular orbital energy data of Ir(ppy)<sub>3</sub>, Ir(Me-ppy)<sub>3</sub>, Ir(Ph-ppy)<sub>3</sub>, Ir(MePh-ppy)<sub>3</sub>, and Ir(diMePh-ppy)<sub>3</sub>

| complex                           | Experimental value |                   |                   |              | DFT calculations |                 |            |
|-----------------------------------|--------------------|-------------------|-------------------|--------------|------------------|-----------------|------------|
|                                   | $E_{1/2}^{ox}$ (V) | $E_{HOMO}^a$ (eV) | $E_{LUMO}^b$ (eV) | $E_g^c$ (eV) | $E_{HOMO}$ (eV)  | $E_{LUMO}$ (eV) | $E_g$ (eV) |
| <b>Ir(ppy)<sub>3</sub></b>        | 0.38               | -5.18             | -2.67             | 2.51         | -5.15            | -1.38           | 3.77       |
| <b>Ir(Me-ppy)<sub>3</sub></b>     | 0.28               | -5.08             | -2.63             | 2.45         | -5.07            | -1.34           | 3.73       |
| <b>Ir(Ph-ppy)<sub>3</sub></b>     | 0.37               | -5.17             | -2.73             | 2.44         | -5.13            | -1.52           | 3.61       |
| <b>Ir(MePh-ppy)<sub>3</sub></b>   | 0.34               | -5.14             | -2.67             | 2.47         | -5.14            | -1.45           | 3.68       |
| <b>Ir(diMePh-ppy)<sub>3</sub></b> | 0.33               | -5.13             | -2.64             | 2.49         | -5.14            | -1.40           | 3.74       |

The HOMO ( $E_{HOMO}$ ), LUMO ( $E_{LUMO}$ ), and Energy gap ( $E_g$ ) value were evaluated according to the following eq.:  $^a E_{HOMO}$  (eV) =  $-(E_{ox} - E_{Fc/Fc^+} + 4.8)$ ,  $^b E_{LUMO}$  (eV) =  $-(E_{HOMO} + E_g)$ , and  $^c E_g^{opt} = 1240/\lambda_{77K}$



**Table S2** Transitions related to  $S_0 \rightarrow T_1$  and  $S_0 \rightarrow S_1$ . The energies ( $\lambda_{\text{cal}}$  and  $E_{\text{cal}}$ ), oscillator strengths ( $f$ ), orbital contributions (>20%), and assignments of for **Ir(ppy)<sub>3</sub>**, **Ir(Me-ppy)<sub>3</sub>**, **Ir(Ph-ppy)<sub>3</sub>**, **Ir(MePh-ppy)<sub>3</sub>**, and **Ir(diMePh-ppy)<sub>3</sub>** evaluated by TD-DFT calculations

|                                   | State          | $\lambda_{\text{cal}}$ ( $E_{\text{cal}}$ ) | $f$    | Orbital contribution             | Assignment                           |
|-----------------------------------|----------------|---------------------------------------------|--------|----------------------------------|--------------------------------------|
| <b>Ir(ppy)<sub>3</sub></b>        | T <sub>1</sub> | 470 nm (2.63 eV)                            | 0      | HOMO->LUMO (62%)                 | MLCT, <sup>a</sup> ILCT <sup>b</sup> |
|                                   | S <sub>1</sub> | 428 nm (2.89 eV)                            | 0.006  | HOMO->LUMO (97%)                 | MLCT, ILCT                           |
|                                   | S <sub>2</sub> | 421 nm (2.94 eV)                            | 0.0024 | HOMO->L+1 (96%)                  | MLCT, ILCT                           |
|                                   | S <sub>3</sub> | 421 nm (2.94 eV)                            | 0.0024 | HOMO->L+2 (96%)                  | MLCT, ILCT, LLCT <sup>c</sup>        |
| <b>Ir(Me-ppy)<sub>3</sub></b>     | T <sub>1</sub> | 473 nm (2.62 eV)                            | 0      | HOMO->LUMO (62%)                 | MLCT, ILCT                           |
|                                   | S <sub>1</sub> | 433 nm (2.86 eV)                            | 0.0046 | HOMO->LUMO (97%)                 | MLCT, ILCT                           |
|                                   | S <sub>2</sub> | 431 nm (2.87 eV)                            | 0.0016 | HOMO->L+2 (89%)                  | MLCT, ILCT, LLCT                     |
|                                   | S <sub>3</sub> | 431 nm (2.87 eV)                            | 0.0016 | HOMO->L+1 (89%)                  | MLCT, ILCT, LLCT                     |
| <b>Ir(Ph-ppy)<sub>3</sub></b>     | T <sub>1</sub> | 473 nm (2.62 eV)                            | 0      | HOMO->LUMO (71%)                 | MLCT, ILCT                           |
|                                   | S <sub>1</sub> | 435 nm (2.85 eV)                            | 0.0044 | HOMO->LUMO (98%)                 | MLCT, ILCT                           |
|                                   | S <sub>2</sub> | 421 nm (2.94 eV)                            | 0.0025 | HOMO->L+1 (65%), HOMO->L+2 (32%) | MLCT, ILCT, LLCT                     |
|                                   | S <sub>3</sub> | 421 nm (2.94 eV)                            | 0.0025 | HOMO->L+1 (32%), HOMO->L+2 (65%) | MLCT, ILCT, LLCT                     |
| <b>Ir(MePh-ppy)<sub>3</sub></b>   | T <sub>1</sub> | 473 nm (2.62 eV)                            | 0      | HOMO->LUMO (71%)                 | MLCT, ILCT                           |
|                                   | S <sub>1</sub> | 435 nm (2.85 eV)                            | 0.0044 | HOMO->LUMO (98%)                 | MLCT, ILCT                           |
|                                   | S <sub>2</sub> | 421 nm (2.94 eV)                            | 0.0025 | HOMO->L+1 (67%), HOMO->L+2 (30%) | MLCT, ILCT                           |
|                                   | S <sub>3</sub> | 421 nm (2.94 eV)                            | 0.0025 | HOMO->L+1 (30%), HOMO->L+2 (67%) | MLCT, ILCT                           |
| <b>Ir(diMePh-ppy)<sub>3</sub></b> | T <sub>1</sub> | 468 nm (2.64 eV)                            | 0      | HOMO->LUMO (67%)                 | MLCT, ILCT                           |
|                                   | S <sub>1</sub> | 429 nm (2.89 eV)                            | 0.0044 | HOMO->LUMO (97%)                 | MLCT, ILCT                           |
|                                   | S <sub>2</sub> | 422 nm (2.93 eV)                            | 0.0019 | HOMO->L+1 (62%), HOMO->L+2 (35%) | MLCT, ILCT, LLCT                     |
|                                   | S <sub>3</sub> | 422 nm (2.93 eV)                            | 0.0019 | HOMO->L+1 (35%), HOMO->L+2 (62%) | MLCT, ILCT, LLCT                     |

<sup>a</sup>Metal to ligand charge transfer. <sup>b</sup>Inter ligand charge transfer. <sup>c</sup>Ligand to ligand charge transfer.

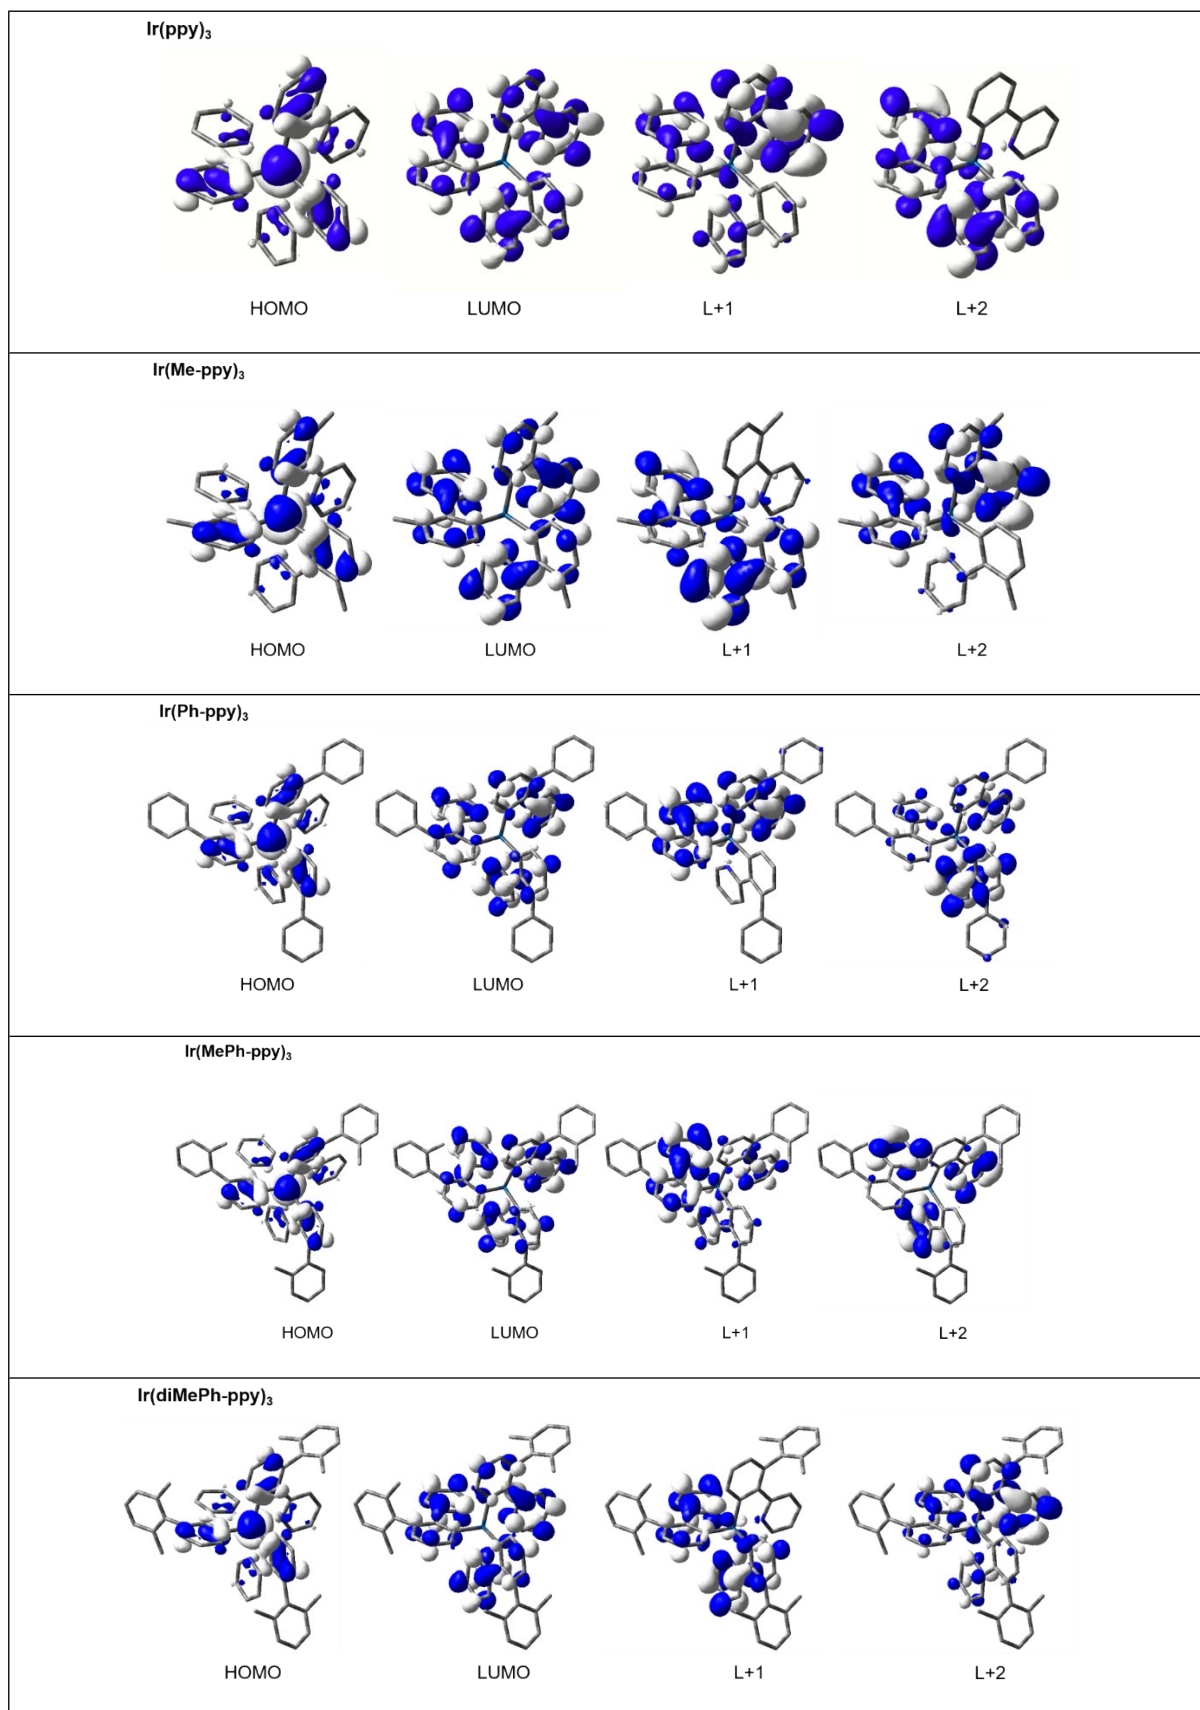

**Table S3** Cartesian Coordinates of **ppy**, **Me-ppy**, **Ph-ppy**, **MePh-ppy**, and **diMePh-ppy**Optimized geometry of singlet **ppy**

| Symbol | X          | Y          | Z          |
|--------|------------|------------|------------|
| C      | 2.8605130  | 1.1690100  | -0.2268440 |
| C      | 3.5417030  | -0.0268210 | 0.0090750  |
| C      | 2.8156300  | -1.1998560 | 0.2317050  |
| C      | 1.4225640  | -1.1759750 | 0.2217730  |
| C      | 0.7247500  | 0.0226920  | -0.0042030 |
| C      | 1.4659610  | 1.1941840  | -0.2338350 |
| H      | 3.4143180  | 2.0843010  | -0.4137660 |
| H      | 4.6274430  | -0.0453930 | 0.0151810  |
| H      | 3.3360440  | -2.1353150 | 0.4156050  |
| H      | 0.8550010  | -2.0840060 | 0.3912530  |
| H      | 0.9572390  | 2.1294160  | -0.4441680 |
| C      | -0.7639790 | 0.0254880  | -0.0020140 |
| C      | -1.5044760 | 1.1924640  | 0.2524780  |
| C      | -2.8952790 | 1.1351000  | 0.2365010  |
| H      | -1.0029310 | 2.1259280  | 0.4800460  |
| C      | -2.7073890 | -1.1963330 | -0.2462690 |
| C      | -3.5194360 | -0.0844080 | -0.0222270 |
| H      | -3.4809850 | 2.0280700  | 0.4326620  |
| H      | -3.1544820 | -2.1691300 | -0.4437300 |
| H      | -4.5999170 | -0.1773380 | -0.0433130 |
| N      | -1.3707300 | -1.1556880 | -0.2409440 |

Optimized geometry of singlet **Me-ppy**

| Symbol | X          | Y          | Z          |
|--------|------------|------------|------------|
| C      | 2.6131790  | -1.6139410 | -0.3286200 |
| C      | 3.4395620  | -0.5078460 | -0.1232060 |
| C      | 2.8699710  | 0.7363590  | 0.1386740  |
| C      | 1.4798830  | 0.9241590  | 0.1847940  |
| C      | 0.6458300  | -0.1963890 | -0.0403950 |
| C      | 1.2323170  | -1.4524150 | -0.2774930 |
| H      | 3.0399590  | -2.5930170 | -0.5248620 |
| H      | 4.5200370  | -0.6140320 | -0.1547200 |
| H      | 3.5162940  | 1.5901810  | 0.3255250  |
| H      | 0.5774580  | -2.3046070 | -0.4255020 |
| C      | -0.8461930 | -0.1332720 | -0.0263400 |
| C      | -1.5622420 | 0.8867430  | -0.6739460 |
| C      | -2.9548020 | 0.8642020  | -0.6526900 |
| H      | -1.0373620 | 1.6708450  | -1.2060140 |
| C      | -2.8146280 | -1.1590620 | 0.6085620  |
| C      | -3.6032260 | -0.1771780 | 0.0087800  |
| H      | -3.5219840 | 1.6432180  | -1.1531770 |
| H      | -3.2820590 | -1.9955670 | 1.1253620  |
| H      | -4.6854800 | -0.2360480 | 0.0534880  |
| N      | -1.4766730 | -1.1504310 | 0.5980240  |
| C      | 0.9556130  | 2.3061850  | 0.5124120  |
| H      | 0.7522070  | 2.8927950  | -0.3915590 |
| H      | 0.0287090  | 2.2715070  | 1.0899760  |
| H      | 1.6973510  | 2.8624550  | 1.0921250  |

Optimized geometry of singlet **Ph-ppy**

| Symbol | X         | Y         | Z         |
|--------|-----------|-----------|-----------|
| C      | 1.0585590 | 3.5369130 | 0.0173710 |

|   |            |            |            |
|---|------------|------------|------------|
| C | -0.3296560 | 3.6775990  | -0.0100900 |
| C | -1.1360530 | 2.5419080  | -0.0108440 |
| C | -0.5897030 | 1.2466670  | 0.0025900  |
| C | 0.8197040  | 1.1072590  | -0.0048920 |
| C | 1.6185570  | 2.2624760  | 0.0216040  |
| H | 1.7009140  | 4.4122830  | 0.0285050  |
| H | -0.7835300 | 4.6640650  | -0.0151960 |
| H | -2.2162240 | 2.6505390  | 0.0115110  |
| H | 2.6965520  | 2.1403880  | 0.0280080  |
| C | 1.5252370  | -0.2070750 | -0.0910900 |
| C | 1.1369300  | -1.1964430 | -1.0093160 |
| C | 1.8718270  | -2.3755590 | -1.0888650 |
| H | 0.2803160  | -1.0349170 | -1.6530010 |
| C | 3.2962780  | -1.5018590 | 0.6195060  |
| C | 2.9757790  | -2.5412110 | -0.2523880 |
| H | 1.5907150  | -3.1490860 | -1.7971450 |
| H | 4.1551070  | -1.5886770 | 1.2827360  |
| H | 3.5770320  | -3.4437990 | -0.2777660 |
| N | 2.6014160  | -0.3599210 | 0.7060330  |
| C | -1.5324810 | 0.0930850  | 0.0879130  |
| C | -1.4106130 | -0.8711190 | 1.1029490  |
| C | -2.6056990 | -0.0165000 | -0.8115620 |
| C | -2.3287740 | -1.9150940 | 1.2094360  |
| H | -0.5984680 | -0.7926800 | 1.8191240  |
| C | -3.5223960 | -1.0641170 | -0.7078920 |
| H | -2.7125570 | 0.7176240  | -1.6049390 |
| C | -3.3870380 | -2.0174710 | 0.3028240  |
| H | -2.2211840 | -2.6461970 | 2.0054300  |
| H | -4.3406600 | -1.1350530 | -1.4185820 |
| H | -4.1006650 | -2.8317920 | 0.3855580  |

Optimized geometry of singlet **PhMe-ppy**

| Symbol | X          | Y          | Z          |
|--------|------------|------------|------------|
| C      | -1.4378480 | 3.4468330  | -0.1102630 |
| C      | -0.0686770 | 3.7154630  | -0.1266440 |
| C      | 0.8391350  | 2.6578230  | -0.1319590 |
| C      | 0.4134330  | 1.3191980  | -0.1306680 |
| C      | -0.9762730 | 1.0498240  | -0.1426720 |
| C      | -1.8786550 | 2.1264120  | -0.1159080 |
| H      | -2.1582760 | 4.2592620  | -0.1001320 |
| H      | 0.2922190  | 4.7396840  | -0.1265510 |
| H      | 1.9056140  | 2.8625970  | -0.1174870 |
| H      | -2.9408250 | 1.9061220  | -0.1125010 |
| C      | -1.5529890 | -0.3268320 | -0.2069560 |
| C      | -1.0530160 | -1.3065220 | -1.0802870 |
| C      | -1.6686010 | -2.5546080 | -1.1257080 |
| H      | -0.2063460 | -1.0871960 | -1.7186410 |
| C      | -3.2052820 | -1.7633590 | 0.5234840  |
| C      | -2.7677760 | -2.7975520 | -0.3030630 |
| H      | -1.2992980 | -3.3218640 | -1.7994930 |
| H      | -4.0644800 | -1.9094780 | 1.1757260  |
| H      | -3.2778050 | -3.7549740 | -0.3041530 |
| N      | -2.6253380 | -0.5578030 | 0.5786790  |
| C      | 1.4669130  | 0.2544590  | -0.0871650 |
| C      | 2.3139350  | 0.0962210  | -1.1949720 |
| C      | 1.6720750  | -0.5437670 | 1.0618710  |
| C      | 3.3331070  | -0.8563900 | -1.1998380 |

|   |            |            |            |   |            |            |            |
|---|------------|------------|------------|---|------------|------------|------------|
| H | 2.1585790  | 0.7258180  | -2.0667870 | C | 1.2141020  | -1.2501470 | -1.0456390 |
| C | 2.7021460  | -1.4936350 | 1.0387580  | C | 1.9512790  | -2.4271950 | -1.1473730 |
| C | 3.5237890  | -1.6604630 | -0.0767970 | H | 0.2940300  | -1.1325190 | -1.6030210 |
| H | 3.9705080  | -0.9659900 | -2.0721920 | C | 3.5409190  | -1.4626740 | 0.3511580  |
| H | 2.8673040  | -2.1071380 | 1.9207900  | C | 3.1414440  | -2.5454480 | -0.4312980 |
| H | 4.3128160  | -2.4067190 | -0.0622670 | H | 1.6033750  | -3.2357470 | -1.7831730 |
| C | 0.8381670  | -0.3727210 | 2.3109120  | H | 4.4667380  | -1.5108290 | 0.9217730  |
| H | 1.2572620  | -0.9531330 | 3.1368690  | H | 3.7472190  | -3.4440330 | -0.4795530 |
| H | 0.7945350  | 0.6767810  | 2.6200510  | N | 2.8440440  | -0.3249980 | 0.4592190  |
| H | -0.1959410 | -0.7014500 | 2.1632650  | C | -1.3608220 | 0.0571440  | 0.1495630  |

Optimized geometry of singlet **diPhMe-ppy**

| Symbol | X          | Y          | Z          |   |            |            |            |
|--------|------------|------------|------------|---|------------|------------|------------|
| C      | 1.2108780  | 3.5260610  | 0.0141290  | C | -1.4332130 | -0.6882380 | 1.3480750  |
| C      | -0.1719810 | 3.6562680  | 0.1508590  | C | -2.2104060 | -0.2556930 | -0.9356080 |
| C      | -0.9695710 | 2.5140460  | 0.1744300  | C | -2.3416650 | -1.7507900 | 1.4328080  |
| C      | -0.4224370 | 1.2257080  | 0.0537970  | C | -3.1024020 | -1.3287840 | -0.8140580 |
| C      | 0.9794740  | 1.0971350  | -0.0922780 | C | -3.1693390 | -2.0752970 | 0.3601900  |
| C      | 1.7726450  | 2.2580380  | -0.0987490 | H | -2.4000850 | -2.3239560 | 2.3543240  |
| H      | 1.8477220  | 4.4054150  | -0.0041170 | H | -3.7485390 | -1.5773800 | -1.6517910 |
| H      | -0.6269140 | 4.6377450  | 0.2459700  | H | -3.8667440 | -2.9042480 | 0.4406320  |
| H      | -2.0435330 | 2.6111120  | 0.3054160  | C | -2.1700140 | 0.5362300  | -2.2249310 |
| H      | 2.8468650  | 2.1444680  | -0.1970900 | H | -2.7579210 | 0.0400930  | -3.0013710 |
| C      | 1.6855290  | -0.2133960 | -0.2242600 | H | -2.5759480 | 1.5454070  | -2.0939390 |
|        |            |            |            | H | -1.1478120 | 0.6587940  | -2.5980010 |
|        |            |            |            | C | -0.5665510 | -0.3498940 | 2.5404500  |
|        |            |            |            | H | -0.6638180 | 0.7046150  | 2.8193460  |
|        |            |            |            | H | -0.8456260 | -0.9573190 | 3.4052160  |
|        |            |            |            | H | 0.4954720  | -0.5250790 | 2.3372690  |

**Table S4** Cartesian Coordinates of **Ir(ppy)<sub>3</sub>**, **Ir(Me-ppy)<sub>3</sub>**, **Ir(Ph-ppy)<sub>3</sub>**, **Ir(MePh-ppy)<sub>3</sub>**, and **Ir(diMePh-ppy)<sub>3</sub>**Optimized geometry of singlet **Ir(ppy)<sub>3</sub>**

| Symbol | X          | Y          | Z          |
|--------|------------|------------|------------|
| C      | 3.2942600  | 2.5739230  | -1.2251140 |
| C      | 2.1926320  | 1.9658940  | -0.5998250 |
| C      | 3.8765390  | 1.9846970  | -2.3399780 |
| C      | 3.3555230  | 0.7831690  | -2.8279640 |
| C      | 2.2674320  | 0.2253290  | -2.1694810 |
| C      | -0.2138160 | -4.3515890 | -2.3367150 |
| C      | -0.9963430 | -3.3014630 | -2.8247500 |
| C      | -0.9380430 | -2.0799790 | -2.1665110 |
| H      | 3.7792080  | 0.2871100  | -3.6937770 |
| H      | 1.8244490  | -0.7068990 | -2.5021610 |
| H      | -1.6376550 | -3.4218980 | -3.6904420 |
| H      | -1.5258180 | -1.2316290 | -2.4994490 |
| C      | 1.4076720  | -2.5300170 | 0.5848270  |
| C      | 2.2650350  | -3.4544260 | 1.2105870  |
| C      | 2.9991420  | -3.0893740 | 2.3337320  |
| H      | 2.3636050  | -4.4651540 | 0.8245110  |
| C      | 2.0278200  | -0.8677820 | 2.2155040  |
| C      | 2.8753380  | -1.7877360 | 2.8348470  |
| H      | 1.9508460  | 0.1332040  | 2.6293000  |
| H      | 3.4439890  | -1.4912240 | 3.7135890  |
| H      | 1.1953100  | -4.9474100 | -0.8324390 |
| C      | 0.6087650  | -2.8817520 | -0.5968450 |
| C      | 0.5872700  | -4.1399450 | -1.2219600 |
| C      | 1.4897630  | 2.4837540  | 0.5817300  |
| C      | 1.8635800  | 3.6884660  | 1.2063130  |
| C      | -0.2614400 | 2.1950640  | 2.2118070  |
| C      | 1.1804470  | 4.1445350  | 2.3283310  |
| H      | 2.6910170  | 4.2769910  | 0.8199330  |
| C      | 0.1131540  | 3.3893180  | 2.8295810  |
| H      | -1.0908390 | 1.6298770  | 2.6263170  |
| H      | -0.4280400 | 3.7358180  | 3.7073690  |
| H      | 3.6918520  | 3.5032810  | -0.8356290 |
| C      | 1.2655080  | -1.1969560 | 1.0760360  |
| N      | -0.1610100 | -1.8693930 | -1.0891570 |
| H      | -0.2302560 | -5.3238230 | -2.8194760 |
| C      | -2.8003870 | 0.9124170  | -0.5996080 |
| C      | -1.3315290 | 1.8498470  | -2.1689960 |
| C      | -3.8788770 | 1.5591920  | -1.2263040 |
| C      | -2.8959070 | 0.0464700  | 0.5832890  |
| C      | -2.3597650 | 2.5104560  | -2.8285880 |
| H      | -0.3026300 | 1.9343820  | -2.5010780 |
| C      | -3.6608650 | 2.3578820  | -2.3415620 |
| H      | -4.8825280 | 1.4365180  | -0.8375760 |
| C      | -4.1255360 | -0.2326760 | 1.2087510  |
| C      | -1.6706230 | -0.4959130 | 1.0764250  |
| H      | -2.1427780 | 3.1254490  | -3.6945670 |
| H      | -4.4943570 | 2.8575330  | -2.8255160 |
| H      | -5.0498410 | 0.1866050  | 0.8212040  |
| C      | -1.7673570 | -1.3180390 | 2.2177340  |
| C      | -2.9882670 | -1.5910290 | 2.8366400  |
| H      | -0.8621380 | -1.7502420 | 2.6336210  |
| H      | -3.0163490 | -2.2297940 | 3.7167820  |
| Ir     | -0.0006620 | 0.0002770  | 0.0379800  |
| H      | 4.7277840  | 2.4545990  | -2.8228270 |
| C      | 0.4048340  | 1.6965860  | 1.0735830  |
| N      | 1.6980290  | 0.7941990  | -1.0920080 |
| N      | -1.5384640 | 1.0724210  | -1.0912570 |

|   |            |            |           |
|---|------------|------------|-----------|
| C | -4.1771720 | -1.0487360 | 2.3334540 |
| H | 3.6593460  | -3.8065990 | 2.8126740 |
| H | 1.4729500  | 5.0749690  | 2.8062520 |
| H | -5.1287410 | -1.2610740 | 2.8120990 |

Optimized geometry of triplet **Ir(ppy)<sub>3</sub>**

| Symbol | X          | Y          | Z          |
|--------|------------|------------|------------|
| C      | -0.7382050 | -4.1183910 | -1.1824310 |
| C      | -0.3092400 | -2.9223210 | -0.5834680 |
| C      | -1.6376270 | -4.0828710 | -2.2401230 |
| C      | -2.1097760 | -2.8490700 | -2.6956750 |
| C      | -1.6513600 | -1.6991260 | -2.0665270 |
| C      | -2.8538040 | 3.2803250  | -2.3428100 |
| C      | -1.5749780 | 3.0371520  | -2.8528370 |
| C      | -0.7683430 | 2.1240630  | -2.1876110 |
| H      | -2.8144750 | -2.7750760 | -3.5159500 |
| H      | -1.9854140 | -0.7158770 | -2.3780640 |
| H      | -1.2096640 | 3.5405450  | -3.7405440 |
| H      | 0.2332220  | 1.8892720  | -2.5308550 |
| C      | -2.7356450 | 0.9223920  | 0.6432530  |
| C      | -3.9822420 | 1.0282930  | 1.2877810  |
| C      | -4.2542180 | 0.2767240  | 2.4259790  |
| H      | -4.7472900 | 1.6984440  | 0.9064980  |
| C      | -2.0364770 | -0.6977150 | 2.2864570  |
| C      | -3.2744350 | -0.5899730 | 2.9236630  |
| H      | -1.2919030 | -1.3731140 | 2.6978130  |
| H      | -3.4775120 | -1.1814340 | 3.8134760  |
| H      | -4.2621060 | 2.7926370  | -0.7995700 |
| C      | -2.4145770 | 1.6966380  | -0.5656520 |
| C      | -3.2728040 | 2.6099620  | -1.2006650 |
| C      | 0.6231180  | -2.8242350 | 0.5482100  |
| C      | 1.2097110  | -3.9607970 | 1.1345070  |
| C      | 1.8001580  | -1.4249720 | 2.1236880  |
| C      | 2.0828080  | -3.8328870 | 2.2090980  |
| H      | 0.9876590  | -4.9532780 | 0.7539090  |
| C      | 2.3757880  | -2.5566300 | 2.7026870  |
| H      | 2.0371250  | -0.4469390 | 2.5305920  |
| H      | 3.0558490  | -2.4442260 | 3.5437220  |
| H      | -0.3701250 | -5.0695350 | -0.8179320 |
| C      | -1.7221820 | 0.0486670  | 1.1359360  |
| N      | -1.1725930 | 1.4751450  | -1.0819570 |
| H      | -3.5172310 | 3.9865830  | -2.8322550 |
| C      | 2.6583720  | 1.2311540  | -0.6560700 |
| C      | 2.1289710  | -0.4518230 | -2.2473620 |
| C      | 3.8809710  | 1.4829830  | -1.3590340 |
| C      | 2.2260970  | 1.8774530  | 0.5192730  |
| C      | 3.3113420  | -0.2430200 | -2.9468740 |
| H      | 1.4211200  | -1.2084430 | -2.5734660 |
| C      | 4.2082200  | 0.7675640  | -2.4811400 |
| H      | 4.5500330  | 2.2538530  | -0.9917400 |
| C      | 2.9679440  | 2.9062170  | 1.1888720  |
| C      | 0.9080980  | 1.4712580  | 1.0769970  |
| H      | 3.5329310  | -0.8395920 | -3.8240970 |
| H      | 5.1356950  | 0.9635300  | -3.0099740 |
| H      | 3.9387130  | 3.2119320  | 0.8117070  |
| C      | 0.4475560  | 2.1462180  | 2.2229560  |
| C      | 1.1874560  | 3.1485010  | 2.8469880  |

|    |            |            |            |
|----|------------|------------|------------|
| H  | -0.5123630 | 1.8609080  | 2.6419350  |
| H  | 0.8119600  | 3.6456980  | 3.7360160  |
| Ir | 0.0131110  | 0.0195060  | 0.0626220  |
| H  | -1.9698410 | -5.0066260 | -2.7034470 |
| C  | 0.9097660  | -1.5157270 | 1.0360350  |
| N  | -0.7749590 | -1.7299960 | -1.0480050 |
| N  | 1.7770760  | 0.2433960  | -1.1579130 |
| C  | 2.4577070  | 3.5150320  | 2.3118350  |
| H  | -5.2175960 | 0.3636530  | 2.9197260  |
| H  | 2.5302250  | -4.7151820 | 2.6569380  |
| H  | 3.0357560  | 4.2942140  | 2.8032140  |

Optimized geometry of singlet Ir(Me-ppy)<sub>3</sub>

| Symbol | X          | Y          | Z          |
|--------|------------|------------|------------|
| C      | 1.7816260  | 3.7936440  | 1.2242420  |
| C      | 1.5067660  | 2.5479510  | 0.6258020  |
| C      | 1.0262940  | 4.2533010  | 2.2974460  |
| C      | -0.0218410 | 3.4744940  | 2.7848990  |
| C      | -0.2729740 | 2.2665050  | 2.1490520  |
| C      | -4.1978810 | -1.2393420 | 2.2952750  |
| C      | -2.9992760 | -1.7557340 | 2.7845440  |
| C      | -1.8272290 | -1.3685030 | 2.1495560  |
| H      | -0.6359870 | 3.7908760  | 3.6203010  |
| H      | -1.0865690 | 1.6230590  | 2.4643710  |
| H      | -2.9663470 | -2.4448050 | 3.6207430  |
| H      | -0.8630610 | -1.7495810 | 2.4665370  |
| C      | -2.7687030 | 0.9541620  | -0.5157840 |
| C      | -3.8049580 | 1.7240130  | -1.1260250 |
| C      | -3.4805600 | 2.5288010  | -2.2231150 |
| C      | -1.1651940 | 1.8690920  | -2.1025350 |
| C      | -2.1783310 | 2.5961790  | -2.7179480 |
| H      | -0.1524900 | 1.9428120  | -2.4853060 |
| H      | -1.9582250 | 3.2283910  | -3.5755860 |
| H      | -5.1143500 | 0.0169320  | 0.8472510  |
| C      | -2.9606990 | 0.0288810  | 0.6237230  |
| C      | -4.1771580 | -0.3567180 | 1.2210110  |
| C      | 2.2122380  | 1.9188830  | -0.5139960 |
| C      | 3.3969470  | 2.4311790  | -1.1247490 |
| C      | 2.1993960  | 0.0753830  | -2.1035160 |
| C      | 3.9302920  | 1.7487400  | -2.2230030 |
| C      | 3.3358020  | 0.5886790  | -2.7189820 |
| H      | 1.7548460  | -0.8366340 | -2.4882950 |
| H      | 3.7714080  | 0.0830800  | -3.5782150 |
| H      | 2.5746320  | 4.4180250  | 0.8515260  |
| C      | -1.4167730 | 1.0417270  | -0.9921330 |
| N      | -1.8029390 | -0.5157090 | 1.1117370  |
| H      | -5.1469870 | -1.5220850 | 2.7402940  |
| C      | 1.4528380  | -2.5786520 | 0.6265040  |
| C      | 2.0974630  | -0.8973240 | 2.1512060  |
| C      | 2.3935740  | -3.4398860 | 1.2253270  |
| C      | 0.5561630  | -2.8745310 | -0.5140650 |
| C      | 3.0175400  | -1.7191820 | 2.7872490  |
| H      | 1.9466690  | 0.1285990  | 2.4678920  |
| C      | 3.1684750  | -3.0159790 | 2.2993100  |
| H      | 2.5375130  | -4.4387180 | 0.8522150  |
| C      | 0.4091840  | -4.1563700 | -1.1255500 |
| C      | -0.1933710 | -1.7466350 | -0.9916340 |
| H      | 3.5977250  | -1.3460130 | 3.6234960  |
| H      | 3.8871290  | -3.6966600 | 2.7453890  |
| C      | -1.0323740 | -1.9416130 | -2.1046780 |

|    |            |            |            |
|----|------------|------------|------------|
| C  | -1.1536540 | -3.1819820 | -2.7216550 |
| H  | -1.5997610 | -1.1006190 | -2.4896750 |
| H  | -1.8079360 | -3.3062480 | -3.5819790 |
| Ir | 0.0001400  | 0.0004010  | 0.0246240  |
| H  | 1.2561660  | 5.2162650  | 2.7431260  |
| C  | 1.6101360  | 0.7057490  | -0.9917040 |
| N  | 0.4549520  | 1.8185010  | 1.1125550  |
| N  | 1.3467220  | -1.3030920 | 1.1134060  |
| C  | -0.4461460 | -4.2768070 | -2.2256430 |
| H  | -4.2658140 | 3.1173410  | -2.6901350 |
| H  | 4.8322020  | 2.1346060  | -2.6906850 |
| H  | -0.5615680 | -5.2505040 | -2.6943600 |
| C  | 4.1649060  | 3.6585770  | -0.6757020 |
| H  | 3.6134550  | 4.5896930  | -0.8527600 |
| H  | 4.4260580  | 3.6260000  | 0.3872530  |
| H  | 5.0997660  | 3.7329860  | -1.2370090 |
| C  | 1.0886240  | -5.4345300 | -0.6755890 |
| H  | 0.9289110  | -5.6437360 | 0.3873300  |
| H  | 0.6866770  | -6.2818150 | -1.2369260 |
| H  | 2.1709240  | -5.4218680 | -0.8515390 |
| C  | -5.2520790 | 1.7731860  | -0.6770120 |
| H  | -5.7821350 | 0.8299590  | -0.8555920 |
| H  | -5.3544850 | 2.0135850  | 0.3863950  |
| H  | -5.7846340 | 2.5462330  | -1.2367610 |

Optimized geometry of triplet Ir(Me-ppy)<sub>3</sub>

| Symbol | X          | Y          | Z          |
|--------|------------|------------|------------|
| C      | 3.7669170  | -1.6095890 | 1.5534340  |
| C      | 2.6158980  | -1.3184760 | 0.7491700  |
| C      | 4.0512320  | -0.8970630 | 2.6907440  |
| C      | 3.1836090  | 0.1651300  | 3.0873550  |
| C      | 2.0549560  | 0.3985530  | 2.3203680  |
| C      | -1.7821890 | 4.0776350  | 2.1286770  |
| C      | -2.2255890 | 2.8438490  | 2.6017700  |
| C      | -1.6856600 | 1.7031930  | 2.0246070  |
| H      | 3.3787310  | 0.7673820  | 3.9670410  |
| H      | 1.3492460  | 1.1770570  | 2.5942100  |
| H      | -2.9737610 | 2.7599410  | 3.3815350  |
| H      | -2.0062060 | 0.7144840  | 2.3320030  |
| C      | 0.7414950  | 2.8194530  | -0.4756810 |
| C      | 1.4733900  | 3.9116000  | -1.0306570 |
| C      | 2.3747430  | 3.6527750  | -2.0687680 |
| C      | 1.8945850  | 1.2931560  | -1.9879990 |
| C      | 2.5776930  | 2.3627420  | -2.5559680 |
| H      | 2.0698870  | 0.2902670  | -2.3617550 |
| H      | 3.2810150  | 2.1945450  | -3.3681180 |
| H      | -0.5052010 | 5.0851700  | 0.7603360  |
| C      | -0.2770560 | 2.9387220  | 0.5922180  |
| C      | -0.8179640 | 4.1236970  | 1.1280910  |
| C      | 2.2047340  | -1.9376590 | -0.4618470 |
| C      | 2.9545320  | -2.9109680 | -1.2321330 |
| C      | 0.3079470  | -2.2261530 | -2.0581940 |
| C      | 2.3358190  | -3.5140160 | -2.3144630 |
| C      | 1.0121180  | -3.2169060 | -2.7298930 |
| H      | -0.6829340 | -1.9476080 | -2.4011360 |
| H      | 0.5850490  | -3.7313050 | -3.5854000 |
| H      | 4.4192270  | -2.4219510 | 1.2743100  |
| C      | 0.9751590  | 1.4834510  | -0.9407480 |
| N      | -0.7512260 | 1.7449260  | 1.0610560  |
| H      | -2.1860530 | 5.0025710  | 2.5285430  |

|    |            |            |            |    |            |            |            |
|----|------------|------------|------------|----|------------|------------|------------|
| C  | -2.4779500 | -1.6609020 | 0.5884990  | C  | -2.7932460 | -0.9401130 | 0.9012630  |
| C  | -0.7985600 | -2.1135910 | 2.1906090  | C  | -3.8617620 | -1.4185420 | 1.6828760  |
| C  | -3.2939650 | -2.6204530 | 1.2198760  | C  | 1.2815990  | 2.6014150  | -0.3672140 |
| C  | -2.8035640 | -0.8397120 | -0.6026980 | C  | 1.9968640  | 3.5722560  | -1.1259870 |
| C  | -1.5742790 | -3.0561410 | 2.8499830  | C  | 2.0120080  | 0.8722380  | -1.9047210 |
| H  | 0.2054600  | -1.8702430 | 2.5194290  | C  | 2.7631480  | 3.1456140  | -2.2175460 |
| C  | -2.8467990 | -3.3111250 | 2.3410200  | C  | 2.7887330  | 1.8014980  | -2.5912600 |
| H  | -4.2760570 | -2.8419130 | 0.8414170  | H  | 2.0049510  | -0.1592290 | -2.2415110 |
| C  | -4.0645660 | -0.8365890 | -1.2733820 | H  | 3.3901580  | 1.4901850  | -3.4424300 |
| C  | -1.7371900 | 0.0001170  | -1.0641820 | H  | 1.3492860  | 4.8478230  | 1.3646530  |
| H  | -1.1873280 | -3.5717010 | 3.7213230  | C  | -1.6863200 | 0.4439550  | -0.7949370 |
| H  | -3.4934310 | -4.0464540 | 2.8098710  | N  | -1.5187760 | -1.0851950 | 1.3708900  |
| C  | -1.9643090 | 0.8055720  | -2.1922620 | H  | -4.4518350 | -2.4530640 | 3.4697360  |
| C  | -3.1866640 | 0.7991860  | -2.8561870 | C  | 2.2091360  | -1.9467410 | 0.9059810  |
| H  | -1.1644980 | 1.4431560  | -2.5554040 | C  | 2.1505070  | -0.2403090 | 2.5241640  |
| H  | -3.3413730 | 1.4264920  | -3.7311290 | C  | 3.1573210  | -2.6319640 | 1.6888240  |
| Ir | 0.0039200  | -0.0250910 | 0.0026510  | C  | 1.6157600  | -2.4122670 | -0.3660460 |
| H  | 4.9245850  | -1.1456680 | 3.2855760  | C  | 3.1189860  | -0.8528130 | 3.3070670  |
| C  | 0.8602260  | -1.5331380 | -0.9660760 | H  | 1.7021020  | 0.7014160  | 2.8194290  |
| N  | 1.7387180  | -0.3035910 | 1.2203510  | C  | 3.6132070  | -2.0875450 | 2.8829570  |
| N  | -1.2291450 | -1.4472950 | 1.1074020  | H  | 3.5246220  | -3.5944780 | 1.3673000  |
| C  | -4.2212550 | -0.0122340 | -2.3929780 | C  | 2.1020520  | -3.5155420 | -1.1251190 |
| H  | 2.9317530  | 4.4826000  | -2.4950360 | C  | 0.4563570  | -1.6863930 | -0.7902610 |
| H  | 2.9037560  | -4.2489230 | -2.8816920 | H  | 3.4539410  | -0.3841160 | 4.2254260  |
| H  | -5.1788590 | -0.0073790 | -2.9064800 | H  | 4.3444300  | -2.6257410 | 3.4782150  |
| C  | 4.3894740  | -3.2988450 | -0.9498010 | C  | -0.2509800 | -2.1886010 | -1.8997000 |
| H  | 5.0336270  | -2.4238680 | -0.8081190 | C  | 0.1676750  | -3.3256580 | -2.5852460 |
| H  | 4.4956200  | -3.9278730 | -0.0566660 | H  | -1.1446190 | -1.6716480 | -2.2337530 |
| H  | 4.7914210  | -3.8722560 | -1.7898650 | H  | -0.4039650 | -3.6947810 | -3.4338250 |
| C  | -5.2821000 | -1.6478050 | -0.8781950 | Ir | -0.0013760 | -0.0021020 | 0.2483820  |
| H  | -5.6012430 | -1.4530140 | 0.1513830  | H  | 0.0923150  | 5.0783080  | 3.4700000  |
| H  | -6.1214490 | -1.3921390 | -1.5294860 | C  | 1.2286290  | 1.2347350  | -0.7920070 |
| H  | -5.1185570 | -2.7270650 | -0.9772830 | N  | -0.1842940 | 1.8536410  | 1.3710910  |
| C  | 1.3870960  | 5.3547060  | -0.5757290 | N  | 1.6944310  | -0.7717500 | 1.3755930  |
| H  | 0.4342550  | 5.8252090  | -0.8459540 | C  | 1.3485610  | -3.9700140 | -2.2144040 |
| H  | 1.5157120  | 5.4624900  | 0.5060910  | H  | -5.0215190 | 0.9245050  | -2.7986880 |
| H  | 2.1755500  | 5.9387070  | -1.0568370 | H  | 3.3089330  | 3.8852140  | -2.7958490 |

Optimized geometry of singlet  $\text{Ir}(\text{Ph-ppy})_3$ 

| Symbol | X          | Y          | Z          |
|--------|------------|------------|------------|
| C      | 0.6970890  | 4.0497760  | 1.6846440  |
| C      | 0.5793820  | 2.8850080  | 0.9030700  |
| C      | -0.0069090 | 4.1751060  | 2.8758130  |
| C      | -0.8321180 | 3.1315620  | 3.2982670  |
| C      | -0.8765270 | 1.9853620  | 2.5170520  |
| C      | -3.6194560 | -2.0889370 | 2.8754090  |
| C      | -2.3034970 | -2.2820250 | 3.2990610  |
| C      | -1.2877840 | -1.7492900 | 2.5177740  |
| H      | -1.4088010 | 3.1893280  | 4.2144340  |
| H      | -1.4694370 | 1.1272500  | 2.8122540  |
| H      | -2.0661970 | -2.8094410 | 4.2160120  |
| H      | -0.2481790 | -1.8345560 | 2.8128330  |
| C      | -2.8970810 | -0.1923190 | -0.3704050 |
| C      | -4.0953490 | -0.0574080 | -1.1292940 |
| C      | -4.1084130 | 0.8205610  | -2.2200570 |
| C      | -1.7634390 | 1.3044820  | -1.9069150 |
| C      | -2.9565420 | 1.5141980  | -2.5930860 |
| H      | -0.8662650 | 1.8136570  | -2.2433590 |
| H      | -2.9870770 | 2.1913940  | -3.4437220 |
| H      | -4.8786350 | -1.2530210 | 1.3615360  |
| C      | -2.7932460 | -0.9401130 | 0.9012630  |
| C      | -3.8617620 | -1.4185420 | 1.6828760  |
| C      | 1.2815990  | 2.6014150  | -0.3672140 |
| C      | 1.9968640  | 3.5722560  | -1.1259870 |
| C      | 2.0120080  | 0.8722380  | -1.9047210 |
| C      | 2.7631480  | 3.1456140  | -2.2175460 |
| C      | 2.7887330  | 1.8014980  | -2.5912600 |
| H      | 2.0049510  | -0.1592290 | -2.2415110 |
| H      | 3.3901580  | 1.4901850  | -3.4424300 |
| H      | 1.3492860  | 4.8478230  | 1.3646530  |
| C      | -1.6863200 | 0.4439550  | -0.7949370 |
| N      | -1.5187760 | -1.0851950 | 1.3708900  |
| H      | -4.4518350 | -2.4530640 | 3.4697360  |
| C      | 2.2091360  | -1.9467410 | 0.9059810  |
| C      | 2.1505070  | -0.2403090 | 2.5241640  |
| C      | 3.1573210  | -2.6319640 | 1.6888240  |
| C      | 1.6157600  | -2.4122670 | -0.3660460 |
| C      | 3.1189860  | -0.8528130 | 3.3070670  |
| H      | 1.7021020  | 0.7014160  | 2.8194290  |
| C      | 3.6132070  | -2.0875450 | 2.8829570  |
| H      | 3.5246220  | -3.5944780 | 1.3673000  |
| C      | 2.1020520  | -3.5155420 | -1.1251190 |
| C      | 0.4563570  | -1.6863930 | -0.7902610 |
| H      | 3.4539410  | -0.3841160 | 4.2254260  |
| H      | 4.3444300  | -2.6257410 | 3.4782150  |
| C      | -0.2509800 | -2.1886010 | -1.8997000 |
| C      | 0.1676750  | -3.3256580 | -2.5852460 |
| H      | -1.1446190 | -1.6716480 | -2.2337530 |
| H      | -0.4039650 | -3.6947810 | -3.4338250 |
| Ir     | -0.0013760 | -0.0021020 | 0.2483820  |
| H      | 0.0923150  | 5.0783080  | 3.4700000  |
| C      | 1.2286290  | 1.2347350  | -0.7920070 |
| N      | -0.1842940 | 1.8536410  | 1.3710910  |
| N      | 1.6944310  | -0.7717500 | 1.3755930  |
| C      | 1.3485610  | -3.9700140 | -2.2144040 |
| H      | -5.0215190 | 0.9245050  | -2.7986880 |
| H      | 3.3089330  | 3.8852140  | -2.7958490 |
| H      | 1.7182340  | -4.8113500 | -2.7930610 |
| C      | 3.4239410  | -4.1850700 | -0.9233170 |
| C      | 4.6213480  | -3.4671450 | -1.0900660 |
| C      | 3.5018280  | -5.5610780 | -0.6547840 |
| C      | 5.8571060  | -4.1034910 | -0.9765110 |
| C      | 4.7397920  | -6.1982990 | -0.5368210 |
| H      | 2.5849620  | -6.1300240 | -0.5289120 |
| C      | 5.9214130  | -5.4717490 | -0.6960000 |
| H      | 6.7711640  | -3.5323550 | -1.1130180 |
| H      | 4.7789510  | -7.2623770 | -0.3211920 |
| H      | 6.8841000  | -5.9665870 | -0.6063790 |
| C      | -5.3401440 | -0.8608170 | -0.9257710 |
| C      | -6.5671000 | -0.2340050 | -0.6555610 |
| C      | -5.3244140 | -2.2568140 | -1.0928860 |
| C      | -7.7415090 | -0.9816410 | -0.5358090 |
| H      | -6.5957450 | 0.8446660  | -0.5297010 |
| C      | -6.4969820 | -3.0029900 | -0.9779750 |
| C      | -7.7104450 | -2.3683900 | -0.6954040 |
| H      | -8.6797230 | -0.4787340 | -0.3187170 |
| H      | -6.4650000 | -4.0803350 | -1.1144930 |
| H      | -8.6231690 | -2.9500320 | -0.6044020 |
| C      | 1.9242520  | 5.0520950  | -0.9218350 |
| C      | 0.7082320  | 5.7377250  | -1.0892200 |
| C      | 3.0812680  | 5.7999800  | -0.6510100 |
| C      | 0.6497310  | 7.1263990  | -0.9742950 |

|   |            |            |            |    |            |            |            |
|---|------------|------------|------------|----|------------|------------|------------|
| C | 3.0224370  | 7.1909670  | -0.5314020 | H  | -0.9582540 | -4.2657940 | -2.7647900 |
| H | 4.0292100  | 5.2844170  | -0.5252790 | Ir | -0.1042330 | -0.0965540 | 0.2582090  |
| C | 1.8067230  | 7.8587310  | -0.6914380 | H  | 0.4593800  | 5.1000800  | 3.2622080  |
| H | -0.2986330 | 7.6384120  | -1.1113330 | C  | 1.3441680  | 0.9184030  | -0.7355540 |
| H | 3.9276250  | 7.7511560  | -0.3143130 | N  | -0.1352330 | 1.8481460  | 1.2794880  |
| H | 1.7605660  | 8.9400880  | -0.6009290 | N  | 1.4261370  | -0.9176400 | 1.5602230  |
| H | 4.5764420  | -2.4049570 | -1.3135990 | C  | 0.9768450  | -4.3128450 | -1.7911480 |
| H | -0.1924720 | 5.1733910  | -1.3139060 | H  | -4.8142630 | 1.2514640  | -3.1064530 |
| H | -4.3847080 | -2.7536030 | -1.3173570 | H  | 3.9260990  | 3.1355520  | -2.6646940 |

Optimized geometry of triplet **Ir(Ph-ppy)<sub>3</sub>**

| Symbol | X          | Y          | Z          |
|--------|------------|------------|------------|
| C      | 1.0505220  | 3.8958070  | 1.5861520  |
| C      | 0.8182980  | 2.7234270  | 0.8434450  |
| C      | 0.2708280  | 4.1927050  | 2.6968970  |
| C      | -0.7464360 | 3.3156300  | 3.0769380  |
| C      | -0.9004480 | 2.1476760  | 2.3438610  |
| C      | -4.0781420 | -1.3975960 | 2.8712920  |
| C      | -2.8235820 | -1.7671490 | 3.3608120  |
| C      | -1.7132740 | -1.4665200 | 2.5852210  |
| H      | -1.3874710 | 3.5128830  | 3.9284680  |
| H      | -1.6447740 | 1.4087500  | 2.6153650  |
| H      | -2.7023700 | -2.2525660 | 4.3223920  |
| H      | -0.7067550 | -1.6881220 | 2.9221580  |
| C      | -2.9730230 | 0.0714930  | -0.4867050 |
| C      | -4.1100880 | 0.3133040  | -1.3097570 |
| C      | -3.9475530 | 1.0670710  | -2.4788150 |
| C      | -1.5680880 | 1.2194250  | -2.1014600 |
| C      | -2.6906360 | 1.5341580  | -2.8632780 |
| H      | -0.5904890 | 1.5481670  | -2.4388350 |
| H      | -2.5873560 | 2.1149740  | -3.7767510 |
| H      | -5.1462410 | -0.4952990 | 1.2515130  |
| C      | -3.0262400 | -0.5631270 | 0.8488860  |
| C      | -4.1785400 | -0.7959450 | 1.6228940  |
| C      | 1.5644630  | 2.2784700  | -0.3536820 |
| C      | 2.4709430  | 3.0955710  | -1.0888220 |
| C      | 2.1308480  | 0.3908550  | -1.7765630 |
| C      | 3.2354820  | 2.5112470  | -2.1059030 |
| C      | 3.0821690  | 1.1647410  | -2.4357390 |
| H      | 1.9839720  | -0.6399550 | -2.0812140 |
| H      | 3.6826380  | 0.7313510  | -3.2317940 |
| H      | 1.8472250  | 4.5648900  | 1.2997960  |
| C      | -1.6685470 | 0.4766650  | -0.9122520 |
| N      | -1.8075560 | -0.8693450 | 1.3839990  |
| H      | -4.9739980 | -1.5731670 | 3.4587940  |
| C      | 1.9406560  | -2.1417540 | 1.0916460  |
| C      | 1.9139060  | -0.3832740 | 2.6840400  |
| C      | 2.9002760  | -2.8301240 | 1.9046500  |
| C      | 1.3972790  | -2.5855300 | -0.1341440 |
| C      | 2.8850000  | -0.9973480 | 3.4713460  |
| H      | 1.4960830  | 0.5765230  | 2.9719650  |
| C      | 3.3619110  | -2.2720430 | 3.0717770  |
| H      | 3.2357130  | -3.8118620 | 1.5991250  |
| C      | 1.8783770  | -3.7253020 | -0.9158840 |
| C      | 0.1693590  | -1.8736540 | -0.5892330 |
| H      | 3.2387040  | -0.5106210 | 4.3725920  |
| H      | 4.0757060  | -2.8088440 | 3.6891580  |
| C      | -0.6660010 | -2.5391450 | -1.4916960 |
| C      | -0.3075330 | -3.7724990 | -2.0488650 |
| H      | -1.5927370 | -2.0662950 | -1.8015150 |

|   |            |            |            |
|---|------------|------------|------------|
| H | 1.2960180  | -5.1854410 | -2.3559320 |
| C | 3.2745500  | -4.2186920 | -0.8756550 |
| C | 4.3633490  | -3.3204710 | -0.8836690 |
| C | 3.5653140  | -5.5981190 | -0.8970210 |
| C | 5.6773050  | -3.7815900 | -0.9210100 |
| C | 4.8819800  | -6.0583090 | -0.9335310 |
| H | 2.7484950  | -6.3136590 | -0.8660720 |
| C | 5.9472850  | -5.1541270 | -0.9458590 |
| H | 6.4954460  | -3.0663970 | -0.9373020 |
| H | 5.0753710  | -7.1276780 | -0.9424220 |
| H | 6.9722940  | -5.5123090 | -0.9700330 |
| C | -5.4743870 | -0.2564110 | -1.0850920 |
| C | -6.5864250 | 0.5841360  | -0.9180670 |
| C | -5.6848730 | -1.6458020 | -1.1268310 |
| C | -7.8703310 | 0.0513660  | -0.7760650 |
| H | -6.4396840 | 1.6601480  | -0.8901250 |
| C | -6.9667970 | -2.1776720 | -0.9895680 |
| C | -8.0647380 | -1.3308400 | -0.8099990 |
| H | -8.7173750 | 0.7178670  | -0.6401540 |
| H | -7.1098970 | -3.2538620 | -1.0284850 |
| H | -9.0627070 | -1.7454790 | -0.7018080 |
| C | 2.6157870  | 4.5761810  | -0.9351660 |
| C | 1.5413590  | 5.4335100  | -1.2299940 |
| C | 3.8497440  | 5.1454810  | -0.5827430 |
| C | 1.6934510  | 6.8179910  | -1.1584130 |
| C | 4.0010350  | 6.5325040  | -0.5064880 |
| H | 4.6903620  | 4.4948910  | -0.3586020 |
| C | 2.9234250  | 7.3729730  | -0.7923990 |
| H | 0.8528690  | 7.4646940  | -1.9377600 |
| H | 4.9616110  | 6.9542700  | -0.2244260 |
| H | 3.0408740  | 8.4511780  | -0.7352530 |
| H | 4.1673470  | -2.2522940 | -0.8761340 |
| H | 0.5851920  | 5.0071670  | -1.5201620 |
| H | -4.8359410 | -2.3080580 | -1.2716620 |

Optimized geometry of singlet **Ir(MePh-ppy)<sub>3</sub>**

| Symbol | X          | Y          | Z          |
|--------|------------|------------|------------|
| C      | 2.3844760  | -3.3764090 | 1.6487000  |
| C      | 1.5605410  | -2.4973090 | 0.9207580  |
| C      | 3.0543160  | -2.9419900 | 2.7865370  |
| C      | 2.9029520  | -1.6221970 | 3.2114410  |
| C      | 2.0615140  | -0.8000610 | 2.4748870  |
| C      | 1.0202020  | 4.1298720  | 2.7674340  |
| C      | -0.0472220 | 3.3411180  | 3.1957820  |
| C      | -0.3390480 | 2.1983540  | 2.4642550  |
| H      | 3.4096540  | -1.2378740 | 4.0894010  |
| H      | 1.8888180  | 0.2304770  | 2.7630670  |
| H      | -0.6337140 | 3.5920500  | 4.0723370  |
| H      | -1.1465470 | 1.5365050  | 2.7560360  |
| C      | 2.0387600  | 2.0825020  | -0.3121190 |
| C      | 3.0891340  | 2.7434060  | -1.0132930 |



|    |            |            |            |   |            |            |            |
|----|------------|------------|------------|---|------------|------------|------------|
| C  | 3.6659270  | 2.1126490  | -2.1220080 | H | 3.1120970  | 7.4255110  | -1.1947160 |
| C  | 2.1608390  | 0.2411950  | -1.8943870 | H | 5.2715940  | 7.5737090  | 0.0042940  |
| C  | 3.2117830  | 0.8671660  | -2.5571200 | C | 1.7533660  | -5.1998600 | -0.6967540 |
| H  | 1.8052260  | -0.7171950 | -2.2586630 | C | 3.1035810  | -5.2071720 | -1.1181690 |
| H  | 3.6747000  | 0.3955080  | -3.4210930 | C | 1.2259190  | -6.3334930 | -0.0606220 |
| H  | 2.5631840  | 4.3666210  | 1.3083520  | C | 3.8801900  | -6.3444470 | -0.8607710 |
| C  | 1.3827860  | 2.6047270  | 0.9090390  | C | 2.0154300  | -7.4575300 | 0.1906810  |
| C  | 1.7314530  | 3.7614880  | 1.6314680  | H | 0.1833750  | -6.3249070 | 0.2455270  |
| C  | 0.7860600  | -2.8077980 | -0.3027380 | C | 3.3514640  | -7.4609160 | -0.2091940 |
| C  | 0.8450180  | -4.0452630 | -1.0076420 | H | 4.9182890  | -6.3546710 | -1.1839080 |
| C  | -0.8750200 | -2.0033550 | -1.8849490 | H | 1.5870520  | -8.3217740 | 0.6901580  |
| C  | 0.0120210  | -4.2342450 | -2.1167920 | H | 3.9788680  | -8.3280630 | -0.0234000 |
| C  | -0.8489030 | -3.2251670 | -2.5496830 | C | -5.3713830 | -1.1652590 | -1.8785800 |
| H  | -1.5313280 | -1.2190680 | -2.2477800 | H | -4.8603450 | -0.7850810 | -2.7696410 |
| H  | -1.4870910 | -3.3939050 | -3.4142150 | H | -4.6062890 | -1.6414510 | -1.2551630 |
| H  | 2.4937660  | -4.4003360 | 1.3286690  | H | -6.0770150 | -1.9384500 | -2.1935160 |
| C  | 1.5409630  | 0.8175450  | -0.7689750 | C | 3.7097750  | -4.0196710 | -1.8291370 |
| N  | 0.3513270  | 1.8337790  | 1.3692990  | H | 3.1146150  | -3.7303210 | -2.7016310 |
| H  | 1.3014650  | 5.0255860  | 3.3127120  | H | 3.7588640  | -3.1415120 | -1.1751380 |
| C  | -2.9524600 | -0.1109540 | 0.9135060  | H | 4.7254680  | -4.2430380 | -2.1660950 |
| C  | -1.7310740 | -1.3838700 | 2.4743300  | C | 1.6797460  | 5.2259750  | -1.8634840 |
| C  | -4.1282450 | -0.4017500 | 1.6308990  | H | 1.7359740  | 4.5678900  | -2.7369320 |
| C  | -2.8329990 | 0.7201490  | -0.3064930 | H | 0.8806820  | 4.8339450  | -1.2238890 |
| C  | -2.8652950 | -1.7139490 | 3.2029930  | H | 1.3791940  | 6.2207910  | -2.2026620 |
| H  | -0.7507500 | -1.7414660 | 2.7674810  |   |            |            |            |
| C  | -4.0867560 | -1.1997950 | 2.7682840  |   |            |            |            |
| H  | -5.0725360 | 0.0023750  | 1.3030680  |   |            |            |            |
| C  | -3.9329970 | 1.2942540  | -1.0079650 |   |            |            |            |
| C  | -1.4897550 | 0.9305280  | -0.7622900 |   |            |            |            |
| H  | -2.7852100 | -2.3450010 | 4.0808360  |   |            |            |            |
| H  | -5.0031140 | -1.4149380 | 3.3093490  |   |            |            |            |
| C  | -1.3039320 | 1.7623850  | -1.8829200 |   |            |            |            |
| C  | -2.3742160 | 2.3540050  | -2.5461830 |   |            |            |            |
| H  | -0.2960040 | 1.9425170  | -2.2418540 |   |            |            |            |
| H  | -2.1999430 | 2.9951540  | -3.4074230 |   |            |            |            |
| Ir | -0.0053850 | 0.0015240  | 0.2652130  |   |            |            |            |
| H  | 3.6870290  | -3.6322650 | 3.3360370  |   |            |            |            |
| C  | -0.0673450 | -1.7501330 | -0.7595540 |   |            |            |            |
| N  | 1.4057830  | -1.2178330 | 1.3780420  |   |            |            |            |
| N  | -1.7653850 | -0.6059230 | 1.3783380  |   |            |            |            |
| C  | -3.6790100 | 2.1126330  | -2.1149690 |   |            |            |            |
| H  | 4.4699760  | 2.6168650  | -2.6501150 |   |            |            |            |
| H  | 0.0566920  | -5.1806520 | -2.6476530 |   |            |            |            |
| H  | -4.5202650 | 2.5517970  | -2.6431460 |   |            |            |            |
| C  | -5.3873980 | 1.0926290  | -0.6933650 |   |            |            |            |
| C  | -6.0817500 | -0.0571950 | -1.1360000 |   |            |            |            |
| C  | -6.0915800 | 2.1076830  | -0.0288370 |   |            |            |            |
| C  | -7.4539920 | -0.1552960 | -0.8710120 |   |            |            |            |
| C  | -7.4590960 | 1.9922270  | 0.2291920  |   |            |            |            |
| H  | -5.5524980 | 2.9939690  | 0.2946530  |   |            |            |            |
| C  | -8.1429510 | 0.8519910  | -0.1917780 |   |            |            |            |
| H  | -7.9916850 | -1.0375180 | -1.2097510 |   |            |            |            |
| H  | -7.9827330 | 2.7882470  | 0.7507880  |   |            |            |            |
| H  | -9.2071090 | 0.7470000  | -0.0003600 |   |            |            |            |
| C  | 3.6480000  | 4.1008900  | -0.6972420 |   |            |            |            |
| C  | 4.8836330  | 4.1965500  | -0.0399880 |   |            |            |            |
| C  | 2.9998970  | 5.2810670  | -1.1303440 |   |            |            |            |
| C  | 5.4718600  | 5.4356860  | 0.2214020  |   |            |            |            |
| H  | 5.3813020  | 3.2836430  | 0.2756250  |   |            |            |            |
| C  | 3.6061320  | 6.5155630  | -0.8629580 |   |            |            |            |
| C  | 4.8267940  | 6.6017820  | -0.1897000 |   |            |            |            |
| H  | 6.4261950  | 5.4862070  | 0.7377360  |   |            |            |            |

Optimized geometry of triplet Ir(MePh-ppy)<sub>3</sub>

| Symbol | X          | Y          | Z          |
|--------|------------|------------|------------|
| C      | -2.8545900 | 2.9004470  | 1.8329220  |
| C      | -1.9084900 | 2.1887650  | 1.0224320  |
| C      | -3.3853800 | 2.3355560  | 2.9648650  |
| C      | -2.9909640 | 1.0204530  | 3.3410610  |
| C      | -2.0294660 | 0.3816510  | 2.5685960  |
| C      | -0.1619760 | -4.2751470 | 2.6398400  |
| C      | 0.8012450  | -3.3507340 | 3.0433400  |
| C      | 0.8777970  | -2.1538420 | 2.3455070  |
| H      | -3.4007050 | 0.5271440  | 4.2146540  |
| H      | -1.6712930 | -0.6069230 | 2.8391210  |
| H      | 1.4673540  | -3.5392870 | 3.8773910  |
| H      | 1.5914180  | -1.3871760 | 2.6223260  |
| C      | -1.6283720 | -2.3189710 | -0.3134140 |
| C      | -2.5893660 | -3.1148690 | -1.0018810 |
| C      | -3.2816200 | -2.5588960 | -2.0840200 |
| C      | -2.0785700 | -0.4830430 | -1.8490390 |
| C      | -3.0340560 | -1.2524680 | -2.5047890 |
| H      | -1.8780780 | 0.5248690  | -2.1951830 |
| H      | -3.5823970 | -0.8422350 | -3.3492780 |
| H      | -1.7333530 | -4.6950200 | 1.2546700  |
| C      | -0.8493450 | -2.7649100 | 0.8646680  |
| C      | -0.9833360 | -3.9824120 | 1.5575350  |
| C      | -1.3056280 | 2.6289680  | -0.1804850 |
| C      | -1.6629210 | 3.8273530  | -0.9265570 |
| C      | 0.6756420  | 2.3538330  | -1.6552590 |
| C      | -0.7744460 | 4.2829870  | -1.8892790 |
| C      | 0.4072420  | 3.5865320  | -2.2476640 |
| H      | 1.5341820  | 1.7809800  | -1.9897120 |
| H      | 1.0508200  | 3.9851610  | -3.0259370 |
| H      | -3.1316710 | 3.9063080  | 1.5504750  |
| C      | -1.3540290 | -0.9846460 | -0.7529050 |
| N      | 0.0783970  | -1.8632110 | 1.3052620  |
| H      | -0.2773260 | -5.2192380 | 3.1631910  |

|    |            |            |            |   |            |            |            |
|----|------------|------------|------------|---|------------|------------|------------|
| C  | 2.9727490  | 0.5814520  | 0.9112330  | H | -5.4088070 | 2.4828500  | -1.8099500 |
| C  | 1.5826350  | 1.5735430  | 2.5401370  | C | -0.9088920 | -5.3647290 | -1.9947250 |
| C  | 4.0962020  | 0.9764990  | 1.6619330  | H | -1.1127920 | -4.7380880 | -2.8695750 |
| C  | 2.9729190  | -0.1733300 | -0.3643740 | H | -0.1479790 | -4.8429470 | -1.4033090 |
| C  | 2.6605420  | 2.0106290  | 3.2963890  | H | -0.4756380 | -6.3059560 | -2.3427890 |
| H  | 0.5597000  | 1.7690780  | 2.8415730  |   |            |            |            |
| C  | 3.9410930  | 1.6891370  | 2.8452420  |   |            |            |            |
| H  | 5.0874690  | 0.7183900  | 1.3251020  |   |            |            |            |
| C  | 4.1429920  | -0.5172950 | -1.1018340 |   |            |            |            |
| C  | 1.6796660  | -0.5676900 | -0.8361490 |   |            |            |            |
| H  | 2.4957840  | 2.5720910  | 4.2088170  |   |            |            |            |
| H  | 4.8178870  | 1.9882660  | 3.4112540  |   |            |            |            |
| C  | 1.6120240  | -1.3505550 | -2.0014240 |   |            |            |            |
| C  | 2.7569250  | -1.7225450 | -2.6999510 |   |            |            |            |
| H  | 0.6414240  | -1.6647950 | -2.3714020 |   |            |            |            |
| H  | 2.6790620  | -2.3296710 | -3.5987560 |   |            |            |            |
| Ir | 0.0690980  | 0.0572980  | 0.2466340  |   |            |            |            |
| H  | -4.0904570 | 2.8926270  | 3.5741820  |   |            |            |            |
| C  | -0.1558900 | 1.8103680  | -0.6643210 |   |            |            |            |
| N  | -1.4725470 | 0.9220390  | 1.4768120  |   |            |            |            |
| N  | 1.7307770  | 0.8785780  | 1.3993920  |   |            |            |            |
| C  | 4.0094650  | -1.2992610 | -2.2556170 |   |            |            |            |
| H  | -4.0140880 | -3.1702480 | -2.6025670 |   |            |            |            |
| H  | -1.0229970 | 5.1997170  | -2.4190060 |   |            |            |            |
| H  | 4.9039800  | -1.5627260 | -2.8121740 |   |            |            |            |
| C  | 5.5470530  | -0.0943340 | -0.7802130 |   |            |            |            |
| C  | 6.0243830  | 1.1906150  | -1.1284720 |   |            |            |            |
| C  | 6.4267980  | -1.0235810 | -0.2053390 |   |            |            |            |
| C  | 7.3635080  | 1.5026770  | -0.8597130 |   |            |            |            |
| C  | 7.7579630  | -0.6941250 | 0.0579360  |   |            |            |            |
| H  | 6.0542330  | -2.0132060 | 0.0446310  |   |            |            |            |
| C  | 8.2269860  | 0.5781420  | -0.2679660 |   |            |            |            |
| H  | 7.7357470  | 2.4889620  | -1.1256830 |   |            |            |            |
| H  | 8.4200150  | -1.4270860 | 0.5098330  |   |            |            |            |
| H  | 9.2600570  | 0.8502050  | -0.0710350 |   |            |            |            |
| C  | -2.9398270 | -4.5416950 | -0.6914490 |   |            |            |            |
| C  | -4.1094450 | -4.8160060 | 0.0324670  |   |            |            |            |
| C  | -2.1633950 | -5.6132110 | -1.1898840 |   |            |            |            |
| C  | -4.5072370 | -6.1284490 | 0.2949220  |   |            |            |            |
| H  | -4.7063910 | -3.9855050 | 0.3992970  |   |            |            |            |
| C  | -2.5788690 | -6.9235570 | -0.9188980 |   |            |            |            |
| C  | -3.7348080 | -7.1877110 | -0.1809280 |   |            |            |            |
| H  | -5.4134750 | -6.3181410 | 0.8628160  |   |            |            |            |
| H  | -1.9852990 | -7.7512180 | -1.2992780 |   |            |            |            |
| H  | -4.0308760 | -8.2146030 | 0.0136360  |   |            |            |            |
| C  | -2.9169000 | 4.6162670  | -0.7321360 |   |            |            |            |
| C  | -4.2000610 | 4.0807870  | -1.0118060 |   |            |            |            |
| C  | -2.8178390 | 5.9615880  | -0.3334380 |   |            |            |            |
| C  | -5.3223140 | 4.9034590  | -0.8530550 |   |            |            |            |
| C  | -3.9474920 | 6.7672820  | -0.1845120 |   |            |            |            |
| H  | -1.8332800 | 6.3706670  | -0.1236010 |   |            |            |            |
| C  | -5.2103610 | 6.2328990  | -0.4392940 |   |            |            |            |
| H  | -6.3052620 | 4.4934970  | -1.0730030 |   |            |            |            |
| H  | -3.8392270 | 7.8008890  | 0.1321630  |   |            |            |            |
| H  | -6.1013320 | 6.8439410  | -0.3254360 |   |            |            |            |
| C  | 5.1220130  | 2.2139930  | -1.7776470 |   |            |            |            |
| H  | 4.6592810  | 1.8171340  | -2.6876150 |   |            |            |            |
| H  | 4.3041590  | 2.5114250  | -1.1116890 |   |            |            |            |
| H  | 5.6814870  | 3.1145370  | -2.0438350 |   |            |            |            |
| C  | -4.3750560 | 2.6640990  | -1.5032800 |   |            |            |            |
| H  | -3.7228130 | 2.4592300  | -2.3591590 |   |            |            |            |
| H  | -4.1168480 | 1.9304920  | -0.7320790 |   |            |            |            |

Optimized geometry of singlet Ir(diMePh-ppy)<sub>3</sub>

| Symbol | X          | Y          | Z          |
|--------|------------|------------|------------|
| C      | 1.7856260  | -3.7655240 | 1.4554290  |
| C      | 1.0490150  | -2.7571420 | 0.8055750  |
| C      | 2.5851220  | -3.4653900 | 2.5523260  |
| C      | 2.6584750  | -2.1501920 | 3.0104120  |
| C      | 1.9184300  | -1.1899960 | 2.3344380  |
| C      | 1.7129430  | 3.9833090  | 2.5405680  |
| C      | 0.5379390  | 3.3903310  | 3.0016710  |
| C      | 0.0760700  | 2.2670960  | 2.3296820  |
| H      | 3.2694750  | -1.8693780 | 3.8607710  |
| H      | 1.9369300  | -0.1492900 | 2.6372840  |
| H      | -0.0101240 | 3.7815890  | 3.8512810  |
| H      | -0.8340170 | 1.7637320  | 2.6356310  |
| C      | 2.4471750  | 1.5981120  | -0.3738670 |
| C      | 3.6584410  | 1.9757150  | -1.0226820 |
| C      | 4.0891270  | 1.2413070  | -2.1343910 |
| C      | 2.1760980  | -0.2176870 | -1.9687780 |
| C      | 3.3549220  | 0.1539240  | -2.6079400 |
| H      | 1.6150770  | -1.0658790 | -2.3477560 |
| H      | 3.7084300  | -0.4006660 | -3.4743580 |
| H      | 3.2778730  | 3.9004460  | 1.0880420  |
| C      | 1.8668810  | 2.2929540  | 0.7993120  |
| C      | 2.3718640  | 3.4375100  | 1.4449380  |
| C      | 0.1592770  | -2.9149130 | -0.3688160 |
| C      | -0.1136150 | -4.1533270 | -1.0188120 |
| C      | -1.2818510 | -1.7773410 | -1.9633470 |
| C      | -0.9653490 | -4.1621610 | -2.1302540 |
| C      | -1.5455230 | -2.9848910 | -2.6025660 |
| H      | -1.7384800 | -0.8688770 | -2.3424850 |
| H      | -2.2028620 | -3.0159030 | -3.4686840 |
| H      | 1.7335320  | -4.7825480 | 1.1010970  |
| C      | 1.6862730  | 0.4774010  | -0.8470190 |
| N      | 0.7118080  | 1.7339050  | 1.2720050  |
| H      | 2.1160630  | 4.8665290  | 3.0265940  |
| C      | -2.9172660 | 0.4729630  | 0.8064520  |
| C      | -1.9925610 | -1.0606740 | 2.3367950  |
| C      | -4.1587670 | 0.3376080  | 1.4561610  |
| C      | -2.6104370 | 1.3215510  | -0.3689290 |
| C      | -3.1941000 | -1.2233690 | 3.0123340  |
| H      | -1.0998040 | -1.5956440 | 2.6401520  |
| C      | -4.2975010 | -0.5043860 | 2.5535640  |
| H      | -5.0143670 | 0.8892290  | 1.1008970  |
| C      | -3.5474580 | 2.1761650  | -1.0188020 |
| C      | -1.2593240 | 1.2279200  | -0.8429450 |
| H      | -3.2555140 | -1.8927340 | 3.8629080  |
| H      | -5.2623170 | -0.5974000 | 3.0427320  |
| C      | -0.9052950 | 2.0030260  | -1.9632810 |
| C      | -1.8199020 | 2.8349820  | -2.6017520 |
| H      | 0.1099850  | 1.9457050  | -2.3420980 |
| H      | -1.5184710 | 3.4210330  | -3.4671410 |
| Ir     | -0.0012430 | 0.0038140  | 0.1773690  |
| H      | 3.1468070  | -4.2551630 | 3.0417910  |
| C      | -0.4343180 | -1.6974820 | -0.8423830 |

|   |            |            |            |    |            |            |            |
|---|------------|------------|------------|----|------------|------------|------------|
| N | 1.1412930  | -1.4763150 | 1.2757620  | C  | -3.3470060 | 2.3419590  | 1.7342350  |
| N | -1.8528640 | -0.2445110 | 1.2779920  | C  | -2.2569440 | 1.8352000  | 0.9501800  |
| C | -3.1297560 | 2.9193020  | -2.1297550 | C  | -3.7928930 | 1.6801650  | 2.8495810  |
| H | 5.0134240  | 1.5326020  | -2.6254360 | C  | -3.1649510 | 0.4601890  | 3.2394290  |
| H | -1.1706430 | -5.1088470 | -2.6221110 | C  | -2.0891860 | 0.0141390  | 2.4867630  |
| H | -3.8474640 | 3.5700220  | -2.6214320 | C  | 0.7924570  | -4.3167650 | 2.4079980  |
| C | -4.9854750 | 2.3794630  | -0.6276190 | C  | 1.5106670  | -3.2131730 | 2.8670360  |
| C | -5.9951210 | 1.5963370  | -1.2306890 | C  | 1.2835510  | -1.9930310 | 2.2461990  |
| C | -5.3289300 | 3.4083470  | 0.2775990  | H  | -3.4963060 | -0.1051350 | 4.1026630  |
| C | -7.3348400 | 1.8425470  | -0.9030840 | H  | -1.5649210 | -0.8974500 | 2.7579880  |
| C | -6.6791870 | 3.6262460  | 0.5807660  | H  | 2.2259820  | -3.2877610 | 3.6780200  |
| C | -7.6789520 | 2.8491720  | -0.0021790 | H  | 1.8114890  | -1.0988190 | 2.5563350  |
| H | -8.1122190 | 1.2373110  | -1.3624570 | C  | -1.2219880 | -2.5783890 | -0.3537690 |
| H | -6.9444170 | 4.4150950  | 1.2800980  | C  | -2.0859360 | -3.5134400 | -0.9930330 |
| H | -8.7221220 | 3.0289960  | 0.2425500  | C  | -2.8913060 | -3.0779840 | -2.0526900 |
| C | 4.5616170  | 3.1114260  | -0.6272550 | C  | -2.0230750 | -0.8378250 | -1.8584560 |
| C | 5.6160040  | 2.8849730  | 0.2854850  | C  | -2.8615750 | -1.7534290 | -2.4863880 |
| C | 4.4046950  | 4.3783870  | -1.2327310 | H  | -2.0022440 | 0.1885820  | -2.2081160 |
| C | 6.4877020  | 3.9373770  | 0.5938530  | H  | -3.4935950 | -1.4395980 | -3.3135900 |
| C | 5.2951730  | 5.4074150  | -0.8995360 | H  | -0.6614930 | -5.0180640 | 1.0076260  |
| C | 6.3304780  | 5.1929620  | 0.0090000  | C  | -0.3099910 | -2.9020600 | 0.7684830  |
| H | 7.2973020  | 3.7653700  | 1.2985910  | C  | -0.1116610 | -4.1618170 | 1.3636140  |
| H | 5.1722900  | 6.3841250  | -1.3605910 | C  | -1.7086700 | 2.3859080  | -0.2369730 |
| H | 7.0137680  | 6.0001770  | 0.2578960  | C  | -2.2173460 | 3.5333480  | -0.9673310 |
| C | 0.4266680  | -5.5010510 | -0.6267340 | C  | 0.2225740  | 2.3201880  | -1.8145160 |
| C | 1.6088160  | -5.9869730 | -1.2289790 | C  | -1.4680070 | 4.0369360  | -2.0188600 |
| C | -0.2951080 | -6.3108480 | 0.2785140  | C  | -0.2416490 | 3.4685930  | -2.4474460 |
| C | 2.0622580  | -7.2711820 | -0.9003960 | H  | 1.1335760  | 1.8482010  | -2.1680010 |
| C | 0.1883960  | -7.5899650 | 0.5829090  | H  | 0.2949950  | 3.9074280  | -3.2829270 |
| C | 1.3604250  | -8.0702660 | 0.0007980  | H  | -3.8151640 | 3.2699520  | 1.4402400  |
| H | 2.9743670  | -7.6442340 | -1.3592450 | C  | -1.1896390 | -1.2142490 | -0.7897310 |
| H | -0.3638600 | -8.2123950 | 1.2823900  | N  | 0.4064190  | -1.8391680 | 1.2400890  |
| H | 1.7238950  | -9.0642800 | 0.2462730  | H  | 0.9341700  | -5.2952920 | 2.8562610  |
| C | -5.6474230 | 0.4941700  | -2.2059030 | C  | 2.8025380  | 1.1285810  | 0.8319630  |
| H | -5.1271890 | 0.8865200  | -3.0862680 | C  | 1.2459400  | 1.8838200  | 2.4385530  |
| H | -4.9802800 | -0.2476200 | -1.7525830 | C  | 3.8100010  | 1.8429060  | 1.5072490  |
| H | -6.5479600 | -0.0240230 | -2.5457820 | C  | 2.9569720  | 0.3039930  | -0.3912430 |
| C | 2.3918110  | -5.1373720 | -2.2045920 | C  | 2.2056610  | 2.6032650  | 3.1358050  |
| H | 1.7918830  | -4.8795060 | -3.0838980 | H  | 0.2089500  | 1.8599620  | 2.7537980  |
| H | 2.7055960  | -4.1905230 | -1.7508120 | C  | 3.5133560  | 2.5755170  | 2.6509800  |
| H | 3.2880860  | -5.6618370 | -2.5461280 | H  | 4.8226170  | 1.8256750  | 1.1375010  |
| C | 3.2859840  | 4.6378480  | -2.2165090 | C  | 4.1885870  | 0.0962350  | -1.0770750 |
| H | 3.3675990  | 3.9915320  | -3.0969560 | C  | 1.7516910  | -0.3050180 | -0.8699300 |
| H | 2.3050400  | 4.4375950  | -1.7709890 | H  | 1.9318080  | 3.1637560  | 4.0222370  |
| H | 3.2978120  | 5.6771560  | -2.5552150 | H  | 4.3026810  | 3.1216030  | 3.1583780  |
| C | 5.8056210  | 1.5333270  | 0.9364040  | C  | 1.8287090  | -1.1138290 | -2.0159260 |
| H | 4.9230730  | 1.2388630  | 1.5154650  | C  | 3.0307270  | -1.3166010 | -2.6885080 |
| H | 5.9671680  | 0.7481400  | 0.1901070  | H  | 0.9263040  | -1.5855100 | -2.3918280 |
| H | 6.6647900  | 1.5429860  | 1.6122780  | H  | 3.0644870  | -1.9414400 | -3.5779050 |
| C | -1.5670710 | -5.8116520 | 0.9262930  | Ir | 0.0465470  | 0.0558740  | 0.1953030  |
| H | -1.3911660 | -4.8984730 | 1.5060000  | H  | -4.6140480 | 2.0857900  | 3.4325370  |
| H | -2.3284880 | -5.5662170 | 0.1782020  | C  | -0.4728970 | 1.7237170  | -0.7487600 |
| H | -1.9827460 | -6.5648330 | 1.6008310  | N  | -1.6153770 | 0.6557680  | 1.4087800  |
| C | -4.2629780 | 4.2618570  | 0.9271600  | N  | 1.5317510  | 1.1748790  | 1.3336330  |
| H | -3.5608900 | 3.6538340  | 1.5087750  | C  | 4.1971390  | -0.7134880 | -2.2199550 |
| H | -3.6685020 | 4.7986710  | 0.1801750  | H  | -3.5471310 | -3.7959910 | -2.5366550 |
| H | -4.7096520 | 4.9982760  | 1.6003840  | H  | -1.8560780 | 4.9040330  | -2.5490310 |
|   |            |            |            | H  | 5.1380080  | -0.8676790 | -2.7405910 |
|   |            |            |            | C  | 5.5265400  | 0.6684530  | -0.6973590 |
|   |            |            |            | C  | 5.9428230  | 1.9044180  | -1.2407340 |
|   |            |            |            | C  | 6.3958500  | -0.0731750 | 0.1337040  |
|   |            |            |            | C  | 7.2191800  | 2.3898890  | -0.9280190 |

Optimized geometry of triplet Ir(diMePh-ppy)<sub>3</sub>

| Symbol | X | Y | Z |
|--------|---|---|---|
|--------|---|---|---|

|   |            |            |            |   |            |            |            |
|---|------------|------------|------------|---|------------|------------|------------|
| C | 7.6647940  | 0.4442150  | 0.4245540  | H | 5.5154250  | 3.6328370  | -2.4609920 |
| C | 8.0770790  | 1.6684210  | -0.0993750 | C | -4.7395420 | 2.3361260  | -1.9003670 |
| H | 7.5391110  | 3.3425610  | -1.3422250 | H | -4.1174110 | 2.3830980  | -2.8011590 |
| H | 8.3333170  | -0.1227920 | 1.0673170  | H | -4.3377640 | 1.5241220  | -1.2845340 |
| H | 9.0641500  | 2.0572530  | 0.1348200  | H | -5.7543540 | 2.0627910  | -2.2018130 |
| C | -2.2358740 | -4.9677940 | -0.6414830 | C | -0.4313650 | -5.5297390 | -2.3488620 |
| C | -3.2036670 | -5.3657770 | 0.3074170  | H | -0.8872020 | -4.9998510 | -3.1922110 |
| C | -1.4666000 | -5.9365030 | -1.3243420 | H | 0.3154670  | -4.8521310 | -1.9199940 |
| C | -3.3746190 | -6.7306220 | 0.5729230  | H | 0.0928210  | -6.4049520 | -2.7414140 |
| C | -1.6650260 | -7.2921360 | -1.0319150 | C | -4.0412690 | -4.3441690 | 1.0435550  |
| C | -2.6109160 | -7.6908320 | -0.0887600 | H | -3.4174440 | -3.6561960 | 1.6254810  |
| H | -4.1164420 | -7.0384270 | 1.3053490  | H | -4.6253200 | -3.7286880 | 0.3510400  |
| H | -1.0706510 | -8.0385260 | -1.5526180 | H | -4.7350430 | -4.8333910 | 1.7321390  |
| H | -2.7540730 | -8.7457940 | 0.1277620  | C | -2.2661180 | 6.0903620  | 0.5006810  |
| C | -3.5242970 | 4.2190280  | -0.6905310 | H | -1.6774120 | 5.3751880  | 1.0849360  |
| C | -4.7328800 | 3.6535050  | -1.1594990 | H | -1.6198110 | 6.4356040  | -0.3139560 |
| C | -3.5414000 | 5.4635490  | -0.0191390 | H | -2.4885610 | 6.9511230  | 1.1374320  |
| C | -5.9374040 | 4.3325500  | -0.9377450 | C | 5.9708420  | -1.4011480 | 0.7191460  |
| C | -4.7655390 | 6.1150470  | 0.1841200  | H | 5.0739220  | -1.2982640 | 1.3404950  |
| C | -5.9588840 | 5.5559820  | -0.2693740 | H | 5.7275190  | -2.1263100 | -0.0646410 |
| H | -6.8654160 | 3.8962120  | -1.2987950 | H | 6.7641910  | -1.8248920 | 1.3403930  |
| H | -4.7783890 | 7.0680220  | 0.7072090  |   |            |            |            |
| H | -6.9010520 | 6.0711560  | -0.1034370 |   |            |            |            |
| C | 5.0282260  | 2.7099400  | -2.1358380 |   |            |            |            |
| H | 4.7382790  | 2.1446730  | -3.0279110 |   |            |            |            |
| H | 4.0997020  | 2.9817700  | -1.6209030 |   |            |            |            |

**Table S5** Selected bond lengths (Å), dihedral angles (degree), and their differences ( $\Delta R_{S_0-T_1}$  and  $\Delta D_{S_0-T_1}$ ) between ground singlet state and excited triplet state for **Ir(ppy)<sub>3</sub>**, **Ir(Me-ppy)<sub>3</sub>**, **Ir(Ph-ppy)<sub>3</sub>**, **Ir(MePh-ppy)<sub>3</sub>**, and **Ir(diMePh-ppy)<sub>3</sub>**<sup>a</sup>

|                                                      | Ir(ppy) <sub>3</sub> | Ir(Me-ppy) <sub>3</sub> | Ir(Ph-ppy) <sub>3</sub> | Ir(MePh-ppy) <sub>3</sub> | Ir(diMePh-ppy) <sub>3</sub> |
|------------------------------------------------------|----------------------|-------------------------|-------------------------|---------------------------|-----------------------------|
| C <sub>Ph</sub> -C <sub>py</sub> (Å), S <sub>0</sub> | 1.47                 | 1.48                    | 1.48                    | 1.48                      | 1.48                        |
| C <sub>Ph</sub> -C <sub>py</sub> (Å), T <sub>1</sub> | 1.41                 | 1.42                    | 1.41                    | 1.41                      | 1.41                        |
| $\Delta R_{S_0-T_1}$ (Å)                             | 0.06                 | 0.06                    | 0.07                    | 0.07                      | 0.07                        |
| D <sub>Ph-py</sub> (deg), S <sub>0</sub>             | 0.69                 | 6.51                    | 12.37                   | 4.96                      | 1.51                        |
| D <sub>Ph-py</sub> (deg), T <sub>1</sub>             | 0.21                 | 7.54                    | 10.97                   | 8.63                      | 5.35                        |
| $\Delta D_{S_0-T_1}$ (deg)                           | 0.48                 | 1.03                    | 1.40                    | 3.67                      | 3.84                        |
| Ir-N <sub>py</sub> (Å), S <sub>0</sub>               | 2.19                 | 2.17                    | 2.18                    | 2.17                      | 2.17                        |
| Ir-N <sub>py</sub> (Å), T <sub>1</sub>               | 2.16                 | 2.14                    | 2.17                    | 2.15                      | 2.14                        |
| $\Delta R_{S_0-T_1}$ (Å)                             | 0.03                 | 0.03                    | 0.01                    | 0.02                      | 0.03                        |
| Ir-C <sub>Ph</sub> (Å), S <sub>0</sub>               | 2.02                 | 2.03                    | 2.03                    | 2.03                      | 2.03                        |
| Ir-C <sub>Ph</sub> (Å), T <sub>1</sub>               | 2.02                 | 1.99                    | 1.99                    | 1.98                      | 1.99                        |
| $\Delta R_{S_0-T_1}$ (Å)                             | 0                    | 0.04                    | 0.04                    | 0.05                      | 0.04                        |

<sup>a</sup> C<sub>Ph</sub>-C<sub>py</sub>, D<sub>Ph-py</sub>, Ir-N<sub>py</sub>, and Ir-C<sub>Ph</sub> indicate the distance and dihedral angle between phenyl-pyridine, Ir-N, and Ir-C, respectively.
